# A joint distribution framework to improve presence-only species distribution models by exploiting opportunistic surveys

Juan M. Escamilla Molgora<sup>a,b,1,\*</sup>, Luigi Sedda<sup>c,1</sup>, Peter Diggle<sup>b,1</sup>, Peter M. Atkinson<sup>d,1</sup>

<sup>a</sup>Lancaster Environment Centre, Lancaster University, Lancaster LA14YQ, UK

<sup>b</sup>Centre for Health Informatics, Computing and Statistics (CHICAS), Lancaster Medical School, Faculty of Health and Medicine, Lancaster University, Lancaster LA1 4YQ, UK

<sup>c</sup>Lancaster Medical School, Faculty of Health and Medicine, Lancaster University, Lancaster LA1 4YQ, UK

<sup>d</sup>Faculty of Science and Technology, Lancaster University, Lancaster LA1 4YR, UK

---

## Abstract

- **Aim:** We propose a Bayesian framework for modelling species distributions using presence-only biodiversity occurrences obtained from historical opportunistic surveys.
- **Location:** Global applicability with two case studies in south-east Mexico.
- **Methods:** The framework defines a bivariate spatial process separable into ecological and sampling effort processes that jointly generate occurrence observations of biodiversity records. Presence-only data are conceived as incomplete observations where some presences have been filtered out. A choosing principle is used to separate out presences, missing data and absences relative to the species of interest and the sampling observations. The framework provides three modelling alternatives for accounting the spatial autocorrelation structure: independent latent variables (model I); common latent spatial random effect (model II); and correlated latent spatial random effects (model III).  
The framework was compared against the Maximum Entropy (MaxEnt) algorithm in two case studies: one for the prediction of pines (Class: Pinopsida), using botanical records as sampling observations and another for the prediction of Flycatchers (Family: Tyranidae), using bird sightings as sampling records.
- **Results:** In both case studies, at least one of the proposed models achieved higher predictive accuracy than MaxEnt. The model with correlated spatial effects fit best when the sampling effort was informative, while the one with a shared spatial effect was more suitable in cases with high proportion of non sampled sites.
- **Main Conclusions:** Our approach provides a flexible framework for presence-only SDMs aided by a sampling effort process informed by the accumulated observations of independent and heterogeneous surveys. For the two case studies, the framework provided a model with a higher predictive accuracy than an optimised version MaxEnt.

*Keywords:* species distribution models, presence-only data, opportunistic sampling, multivariate conditional autoregressive models, model-based statistical ecology,

---

## 1. Introduction

Species distribution models (SDMs) are statistical and computational methods for characterising the distribution of organisms across space (Guisan and Zimmermann, 2000; Elith and Leathwick,

---

\* Corresponding author

*Email addresses:* [j.escamillamolgora@lancaster.ac.uk](mailto:j.escamillamolgora@lancaster.ac.uk) (Juan M. Escamilla Molgora), [l.sedda@lancaster.ac.uk](mailto:l.sedda@lancaster.ac.uk) (Luigi Sedda), [p.diggle@lancaster.ac.uk](mailto:p.diggle@lancaster.ac.uk) (Peter Diggle), [pma@lancaster.ac.uk](mailto:pma@lancaster.ac.uk) (Peter M. Atkinson)

38 2009). The predictive capabilities of these models allow forecasting changes in species distribu-  
39 tion under different environmental scenarios, providing meaningful insights in which to assess  
40 biodiversity loss (Pereira et al., 2010), adaptation to climate change (Wiens et al., 2009), ecosystem  
41 management and conservation (Navarro et al., 2017) or risk of invasive species (Jiménez-Valverde  
42 et al., 2011). Modelling species distributions have helped to develop strategies for management,  
43 adaptation and mitigation of human-induced impacts to the biosphere (Ferrier et al., 2016; Foden  
44 and Young, 2016; Intergovernmental Panel on Climate Change, 2014).

45 SDMs use occurrence observations as response variable(s) and environmental features (covari-  
46 ates) as explanatory variables. The methodological frameworks for estimating species distribu-  
47 tions are diverse. For example, early methods for estimating potential distributions include the  
48 method of environmental envelope (Booth, 1985) for characterising suitability areas correlated  
49 with climatic variables. Later, generalised linear models (GLMs) and generalised additive models  
50 (GAMs) (Guisan and Zimmermann, 2000; Guisan et al., 2002) and (Keating and Cherry, 2004) were  
51 used to model distributions based on presence and absence records. Machine learning meth-  
52 ods have also been used. Specifically, supervised classification algorithms have been extensively  
53 used (e.g. Segurado and Araújo (2004); Elith et al. (2006); Peterson et al. (2011)). These methods  
54 include boosted regression trees (BRT, Friedman (2001)), multivariate adaptive regression spline  
55 (MARS, Friedman (1991)) and artificial neural networks (ANN, Rosenblatt (1958)). The R package  
56 `sdm` (Naimi and Araújo, 2016) includes an exhaustive list of machine learning methods for fitting  
57 species distribution models.

58 One of the main concerns in applying machine learning methods for predicting species distribu-  
59 tions is the abstraction of complex ecological processes into a black-box classification machine  
60 that does not explicitly describe the stochastic nature that generates the observations, limiting  
61 their scientific interpretability (Haegeman and Loreau, 2008; Gelfand and Shirota, 2019). In this  
62 sense, model-based statistical methods are better fit to describe the underlying mechanisms of  
63 species distributions. In particular, joint stochastic modelling and hierarchical Bayesian mod-  
64 els have recently been proposed to account for uncertainties in the parameters estimations and  
65 for defining more flexible random effects. For example, in cases where spatial autocorrelation  
66 is present, the use of Gaussian Processes (Golding and Purse, 2016) or Gaussian Markov Random  
67 Fields (GMRF) (Illian et al., 2013) have been shown to increase predictive accuracy. Although these  
68 models are statistically sound, their major limitation is their reliance on presence-absence data,  
69 which generally are not available. In cases where the goal is the modelling of species distributions  
70 across large geographic regions, the collection of presence-absence records requires a careful sam-  
71 pling design with possibly hundreds of experts deployed in the field for data collection. Surveys  
72 of this kind are atypical and usually are developed by governments or similar sized institutions  
73 that can afford full inventory or census data (e.g. forest Inventory and analysis (Smith, 2002) and  
74 *Inventario Nacional Forestal* (CONAFOR, 2018)).

75 The widespread use of opportunistic observations has been favoured by citizen science initiatives  
76 and the availability of large and open repositories like: The Global Biodiversity Information Facil-

77 ity GBIF (GBIF Secretariat, 2015), eBird for bird sightings (Hudson et al., 2014) and the PREDICTS  
78 database (Sullivan et al., 2009)). These records are often derived from museums, herbaria collec-  
79 tions or unstructured citizen observations. As such, the data are often limited to presence-only  
80 observations and, therefore, do not include information on where or when a given species was *not*  
81 found (i.e. absences). In addition, the information related to sampling design is frequently lost, or  
82 does not exist, and the data itself are prone to several sources of bias in space, time, and detectabil-  
83 ity among species and habitats (Dickinson et al., 2010; Beck et al., 2014; Isaac and Pocock, 2015;  
84 Franklin et al., 2016). Despite the inevitable problem of their sampling bias, presence-only obser-  
85 vations contain valuable information about species distributions and, therefore, several modelling  
86 frameworks for presence-only data have been proposed for such purposes.

87 With the exception of some unrealistic assumptions about the absences on presence-only mod-  
88 els (e.g. assuming that absence of evidence is equivalent to evidence of absence), estimating the  
89 probability for species occurrence using solely presence-only observations involves a problem of  
90 model identification (Ward et al., 2009). That is, the model has multiple solutions and is not pos-  
91 sible to make reliable inferences. This problem has lead to recognise the importance of incorpo-  
92 rating other sources of information into SDMs based on presence-only data.

93 One of the earliest methods is the Maximum Entropy (MaxEnt) algorithm (Phillips et al., 2006) for  
94 predicting occurrences based on the density of environmental covariates conditional to the known  
95 species presences using background data. The background data are samples from the available  
96 area and can include presences or absence of observations. The MaxEnt algorithm reduces pre-  
97 dictions to an optimal density distribution calculated with a constrained optimization algorithm,  
98 ignoring accountability for uncertainties related to the optimised distribution and the specifica-  
99 tion of other random effects. Despite this, it has shown to perform well in practice (Elith et al.,  
100 2006) and is still one of the most widely used methods for predicting species distributions (> 2600  
101 articles in Web of Science at the time of writing).

102 Phillips et al. (2009) recognised the effect of the sampling bias in presence-only distribution mod-  
103 els and proposed the use of occurrence records of other species that are have been collected using  
104 the similar methods (called a "target group" in the sense of Phillips et al. (2009)). In their work, they  
105 proposed a joint model for accounting the sampling bias and implemented their methodology in  
106 three generic types of models: GAMs, MARS, BRTs and Maxent. Their conclusion was that using  
107 and informed background data (one that potentially shares same characteristics of the sampling  
108 process) significantly improves the models' accuracy.

109 The use of joint modelling methods for accounting sampling bias has been addressed by other au-  
110 thors. For example, the expectation maximization algorithm for estimating underlying presence-  
111 absence processes (Ward et al., 2009) aims to infer the underlying presence-absence logistic signal  
112 of the data used as presence-only observations. This approach does not account for spatial de-  
113 dependencies. The occupancy model proposed by Royle and Kéry (2007) specifies a hierarchical  
114 Bayesian model for accounting the joint effect of two components, one for imperfectly observed  
115 occupancy and the other for detections conditional on that process. Inconveniently, this partic-

116 ular model is suited for longitudinal data (i.e. time series) and does not account for any spatial  
117 effect.

118 In this regard, the framework developed by Pacifici et al. (2017) accounts spatial dependencies in  
119 both components, one for presence-only data and other based on presence-absence. However,  
120 both proposals do not allow the explicit modelling of the preferential sampling.

121 Although these models have advanced the SDMs in many aspects, a more integrated spatial sta-  
122 tistical framework for species distributions using presence-only data that can explicitly model the  
123 spatial influence of the sampling effort is still needed. We consider that a framework of this kind  
124 with the capability for jointly modelling the sampling effort and the ecological processes using a  
125 flexible design for defining missing data can contribute to a greater predictive accuracy by exploit-  
126 ing citizen science effort.

127 We present a statistical framework for modelling species distributions using presence-only data.  
128 We assume that the registered occurrences of a taxon of interest (ToI) are incomplete observations  
129 of a bivariate process that includes information about the environmental suitability (i.e. where the  
130 ToI can live) and complementary occurrence data that serve as a proxy for sampling effort, pro-  
131 viding information on how the observations were recorded. The framework specifies three hierar-  
132 chical bayesian models that jointly specifies the ecological and sampling processes. The approach  
133 provides a full description of the data generating process, giving a more direct interpretation of  
134 the parameters as well as giving explicit estimates of their uncertainties. The presented model  
135 assumes that the species populations are static in time and in equilibrium with the environment  
136 (in the sense of Guisan and Zimmermann (2000)). Therefore, this model does not differentiate  
137 between sink populations or populations with sustained growth.

138 The paper is structured as follows. Section 2 describes the general specification of the frameworks.  
139 Here, we develop a logistic hierarchical model defined as a bivariate process that accounts for  
140 spatial random effects. Our most general model (full description in appendix: Appendix A.3.3)  
141 includes a latent bivariate spatial process with correlated components. We also consider two ex-  
142 treme special cases: in model I (appendix: Appendix A.3.1) the two component processes are in-  
143 dependent; in model II (appendix: Appendix A.3.2) they are proportional. In section 3 we propose  
144 two study cases for predicting presences of Pines (class: *Pinopsida*) and Flycatchers (family: *Tyran-*  
145 *nidae*). The prediction analysis is described in sections 4.1 and 4.2, respectively. We compared the  
146 framework using the three models with the MaxEnt algorithm as a standard benchmark. Finally,  
147 section 5 discusses the methodology, caveats and future research.

## 148 **2. Materials and Methods**

149 As presence-only data lack real absences, there exists no knowledge on whether the absence of  
150 data is due to the inaccessibility of a potential sampling location or the real absence of the taxon  
151 of interest (ToI). This ambiguity suggests that presence-only data provide incomplete evidence of  
152 two underlying processes acting together. A process  $P_Y$  that generates the ecological phenomenon

153 of a taxon's occurrence, and a process  $P_X$  associated with the sampling effort or survey. As such, lo-  
154 cations with no records of the ecological phenomenon or sampling effort indicates incomplete or  
155 missing information. Our proposal is an attempt to model these two processes using a hierarchi-  
156 cal Bayesian framework with the aim to predict probability of occurrence for a ToI using presence-  
157 only data under different configurations of the spatial autocorrelation of  $X$  and  $Y$ .

## 158 2.1. Model summary

159 In general, the framework specifies a Bayesian hierarchical model that accounts for the joint effect  
160 of two components; an ecological process ( $P_Y$ ), that drives the occurrence of species of interest  
161 in the study region, and a sampling effort process ( $P_X$ ) that models how the occurrence data were  
162 sampled. Each stochastic process include a structural component (fixed effect) and a random  
163 effect that includes the specification of spatial autocorrelation. The model is defined in a discrete  
164 spatial lattice. Consequently the estimations are also discrete and are defined in each area element  
165 of the lattice. The support of the model is the area element.

166 The presence-only data is assumed to represent realizations of a bivariate stochastic binary pro-  
167 cess (Bernoulli) separable in two components: one relative to an ecological process  $P_Y$  that drives  
168 the environmental suitability for the ToI, and another process  $P_X$  related to the sampling effort.  
169  $P_X$  and  $P_Y$  are modelled according to the following equations:

$$\log\left(\frac{p_y}{1-p_y}\right) = d_Y^t \beta_Y + r_y \quad (1)$$

$$\log\left(\frac{p_x}{1-p_x}\right) = d_X^t \beta_X + r_x \quad (2)$$

170 where  $d_X$  and  $d_Y$  represent vectors of explanatory variables and  $r_X$  and  $r_Y$  the random effects for  $X$   
171 and  $Y$ , respectively. Specifically,  $d_Y$  is suited for environmental variables of ecological importance,  
172 while  $d_X$  should account for variables that help explain the sampling process.

173 The data used to fit both processes includes information on known occurrences of the ToI, the  
174 sampling effort and missing observations. To predict the probability for sites with missing data,  
175 we use the *data augmentation* scheme proposed by Tanner and Wong (1987) and implemented by  
176 Lee (2013) in the R-Cran package *CARBayes*. The approach generates posterior samples of  $X$  and  
177  $Y$  as well as the latent variables related to processes  $P_Y$  and  $P_X$  in all locations, including the ones  
178 with missing observations (i.e.  $\tilde{X}$  and  $\tilde{Y}$ ).

179 The full model specification is explained in the supplementary materials Appendix A.

### 180 2.1.1. Three models for spatial variation

181 The proposed framework assumes that the ecological process  $P_Y$  and the anthropogenic sampling  
182 process  $P_X$  are conditionally independent given the random effects  $R_Y$  and  $R_X$ . Figure 1 show the  
183 model structure while a detailed description of the framework specification is in the supplemen-  
184 tary materials Appendix A.

185 The spatial random effect are described by components  $S_Y$  (ToI) and  $S_X$  (sampling effort). The  
186 only source of dependency between  $R_Y$  and  $R_X$  is the dependency between these spatial compo-  
187 nents. In addition, each random effect incorporates an independent component for modelling  
188 unstructured variation, namely variables  $Z_Y$  and  $Z_X$ , corresponding to  $R_Y$  and  $R_X$  respectively.  
189 The framework assumes that the observations of presence for the ToI and the existence of the  
190 survey (sampling) are independent when conditioned to the spatial effect. As such, the spatial  
191 autocorrelation structure is responsible for informing both processes. To test for this effect we de-  
192 signed three possible models in which the spatial processes  $S_Y$  and  $S_X$  inform  $R_Y$  and  $R_X$ . Model I  
193 where  $S_Y$  and  $S_X$  are independent, model II with one shared spatial process ( $S_X = S_Y$ ) and model  
194 III where  $S_X$  and  $S_Y$  are correlated components. Schematics of the directed acyclic graphs (DAG)  
195 describing the three models are reported in figure 1, while the full description of the framework is  
196 described in supplementary materials Appendix A.

197 We are aware that estimating real probability of occurrence using presence-only data is not pos-  
198 sible given the inherently sampling bias of these type of data (e.g Guillera-Aroita et al. (2014)).  
199 Along this text, we refer to *environmental suitability* as the spatial variation across space that de-  
200 termines a species to live, settle or occupy a given area. This definition disregards the scale of the  
201 given value for a particular area. In other situations, we use the term *probability of occurrence*  
202 to account for the spatial variation of the ecological process (i.e. environmental suitability) in a  
203 probabilistic context, that is, where the spatial variation ranges in values from 0 to 1. To exemplify  
204 this compare the range in values of the latent variable  $S_Y$  (spatial effect) to those of the ecological  
205 process  $P_Y$ . Values in  $P_Y$  are range only within the  $[0, 1]$  interval.

### 206 2.1.2. Selection of explanatory variables

207 Our framework is based on the Grinnellian definition of ecological niche, that is, a niche defined  
208 by non-interactive and non-consumable (scenopoetic) variables with environmental conditions  
209 changing smoothly and coarsely in space (Soberón, 2007). The selection of these explanatory  
210 variables (covariates) are crucial for the interpretability of the model and, although, the general  
211 specifications for  $P_X$  and  $P_Y$  are mathematically similar (eqs. A.7 and A.8), they describe very dif-  
212 ferent processes.  $P_Y$  models the environmental suitability for a ToI to occupy the area under study.  
213 Therefore, its associated explanatory variables ( $d_Y$ ) should be of ecological interest. Examples of  
214 these variables are: temperature, precipitation, evapotranspiration, elevation, slope and vegeta-  
215 tion cover. On the other hand,  $P_X$  models the probability of a ToI to be sampled, given that it  
216 has been observed. This process is assumed to be independent from the environmental suitabil-  
217 ity and it is fully determined by anthropic variables such as: distance to closest road, population  
218 density, infrastructures, political borders or land use type. The selection of covariates depends on  
219 the nature and specificities of each problem and research question. Therefore, the classification  
220 between anthropic and ecological variables is not necessarily mutually exclusive.

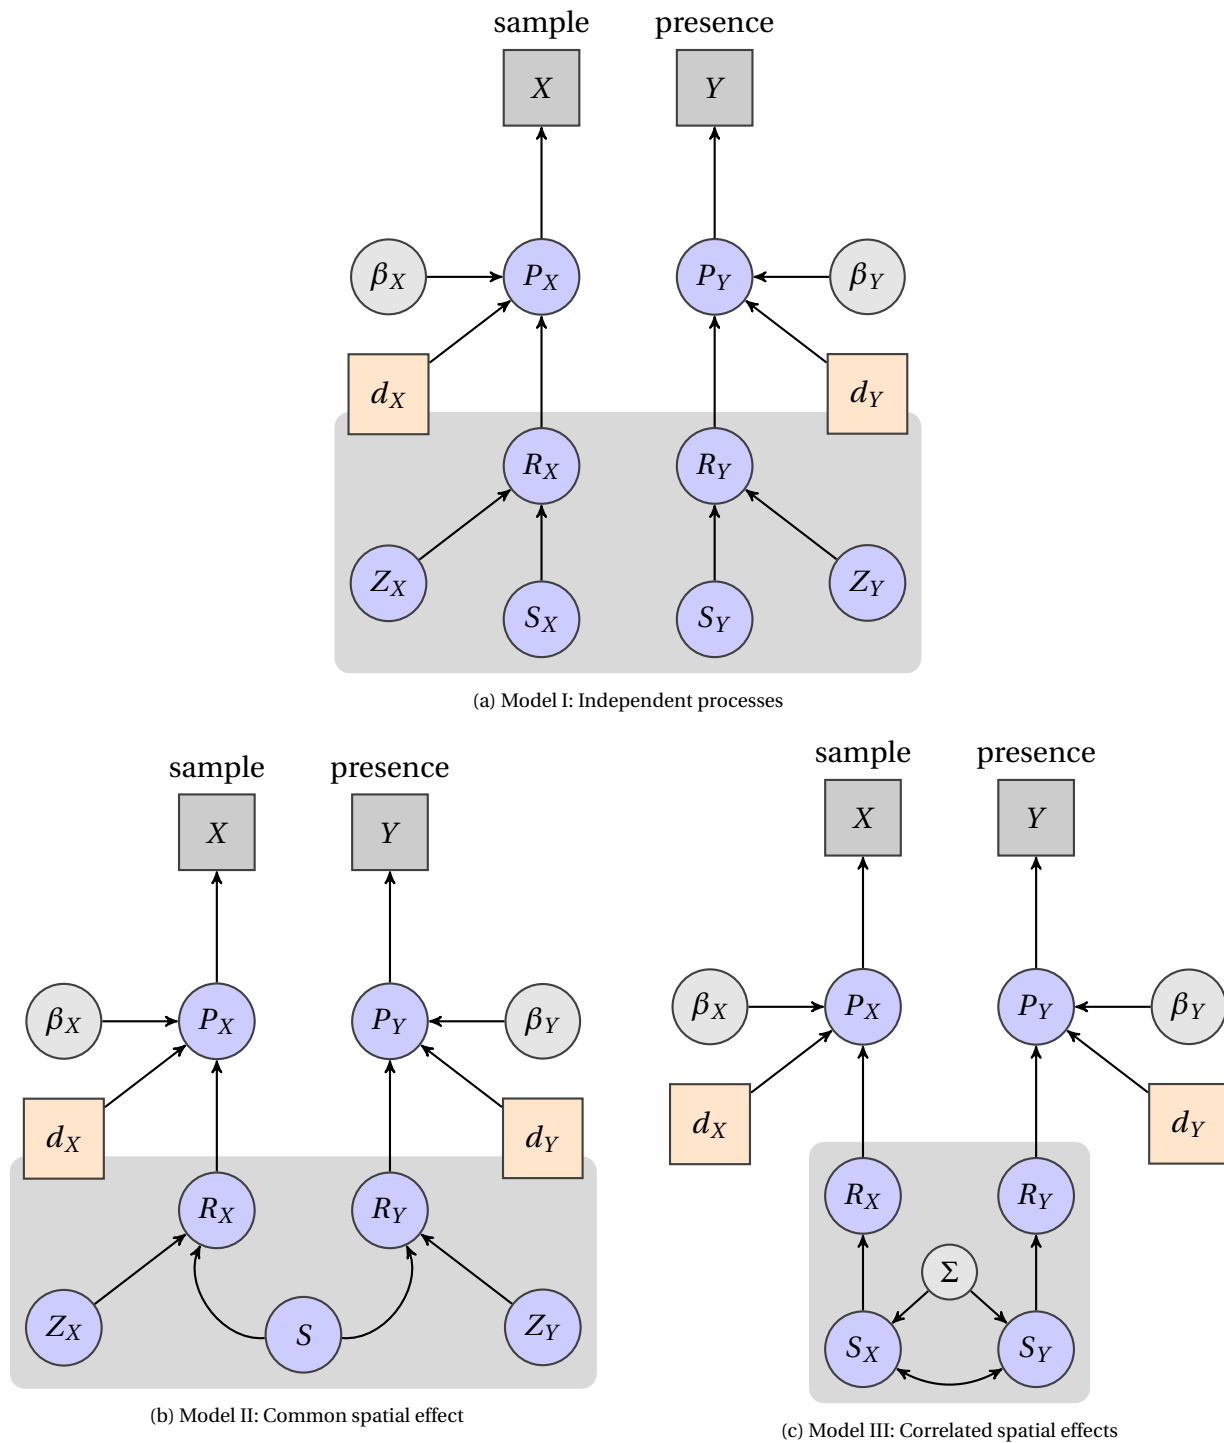

Figure 1: Directed acyclic graphs for the three model specifications. Variables in squares account for observations:  $Y$  : presence of a taxon of interest (e.g. species) and  $X$  : presence of sample. Circles in blue correspond to latent variables while circles in grey correspond to parameters. Variables  $P_X$  and  $P_Y$  correspond to the latent processes of the sampling effort and environmental suitability, variables  $R_X$  and  $R_Y$  correspond to the random effect for the sampling effort and the environmental suitability processes respectively. Variables  $\beta_X$  and  $\beta_Y$  represent the parameters of the fixed effects (linear components) of the latent processes  $P_X$  and  $P_Y$  respectively. Squares in salmon colour indicate environmental ( $d_Y$ ) and anthropic ( $d_X$ ) explanatory variables. The variables inside the dark grey block define the random effects component; different in the three models. Variables  $S$ ,  $S_X$  and  $S_Y$  describe the spatial component defined as Gaussian Markov Random Fields, while variables  $Z_X$  and  $Z_Y$  represent unstructured variability within an area.

221 **2.2. A Choosing Principle for obtaining presences, relative absences and missing observations**

222 Estimating the probability of occurrence using solely presence-only observations necessarily re-  
 223 quires additional assumptions about non-existent absences (Ward et al., 2009). Thus, any non

224 recorded presence of the taxon of interest (ToI) can potentially be a real absence (i.e. the area is  
225 not inhabited by the ToI) or an unobserved presence (i.e. the ToI inhabits the area but there is not  
226 record about it). The fundamental concept of this work is to use occurrence records of other taxa  
227 that are considered to share a similar sampling pattern as the ToI. These occurrences are used to  
228 model a sample effort process that informs about the presence and absence of the taxon of inter-  
229 est.

230 Models I, II and III specify a joint bivariate process that uses two vectors of observations as inputs;  
231 one ( $Y$ ) for fitting the ecological process ( $P_Y$ ) and other ( $X$ ) for fitting the associated sampling  
232 effort process ( $P_X$ ). These input vectors (hereafter called *response vectors*) are composed of  $k$  en-  
233 tries, one for each area element of the spatial lattice. Each entry has assigned one of three possible  
234 states: *presence* (1), *relative absence* (0) or *missing data* (N.A). As such, for a given site ( $k$ ), a state of  
235 *presence* indicates that the taxa of interest (ToI) has been observed. A state of *relative absence* (0)  
236 indicates that the surrogate taxon is present (i.e.  $X_k = 1$ ) but the ToI is absent (i.e.  $Y_k = 0$ ). A state of  
237 *missing data* (also called *missing observations*) indicates that the neither the ToI nor the surrogate  
238 taxa are present in the site  $k$  (i.e.  $X_k = 0 = Y_k$ ).

239 As we are using exclusively occurrence data we need an algorithm for deriving response vectors  $X$   
240 and  $Y$  from presence-only records. We call this algorithm the *choosing principle* and receives two  
241 lists as inputs: *target* ( $\mathbf{t}$ ) and *background* ( $\mathbf{b}$ ). These lists are obtained by checking the existence of  
242 an occurrence on each area element of the spatial lattice. That is, if on a given area, there exists  
243 at least one record inside, assign a 1, otherwise assign a 0. This procedure is repeated on all the  
244  $k$  areas of the spatial lattice. Contrary to the response vectors  $X$  and  $Y$ , where each entry can  
245 be either 1, 0 or N.A., the entries of  $\mathbf{t}$  and  $\mathbf{b}$  are composed binary (i.e. 0 or 1). Obtaining the  
246 missing values (N.A.) is performed by transforming  $\mathbf{t}$  and  $\mathbf{b}$  into response vectors  $X$  and  $Y$  using  
247 the *choosing principle*. As such, the choosing principle defines the missing data for  $X$  and  $Y$ , given  
248 the presence-absence lists of the target and background observations.

249 There are many possibilities to define a choosing principle. Here, we used one that, for a given site  
250  $i$ , assigns: missing data (N.A.) where neither the background nor target observations are present  
251 (i.e.  $t_i = 0 = b_i$ ), 0 where there is no presence of a target observation but has a background observa-  
252 tion (i.e.  $t_i = 0$  and  $b_i = 1$ ), and 1 to locations where there is presence of the target taxa (i.e.  $t_i = 1$ )  
253 Algorithm 1 describes this *choosing principle*.

254 It is worth noting that, for each response vector, a target ( $\mathbf{t}$ ) and background ( $\mathbf{b}$ ) lists are needed.  
255 Specifically, for obtaining the response vector of the ToI ( $Y$ ) the target and background list would  
256 correspond to the occurrences list of the taxon of interest and the surrogate taxa (or taxon) re-  
257 spectively. In the case of the sample observations ( $X$ ), the target list would correspond to the  
258 surrogate taxa while the background list could be any taxonomic group that, upon consideration  
259 of the researcher, informs the sampling effort process. A pragmatic selection would be the use of  
260 all available records, disregarding their taxonomic classification.

261 The selected choosing principle is reasonable from an ecological view. If, on average, the existence  
262 of  $X$  informs the occurrence of  $Y$ , we can argue that: if a site  $i$  has no background information,



---

**Choosing principle:** Obtaining a response vector  $R$  using background  $\hat{b}$  and target observations  $\hat{i}$  over a spatial lattice composed of  $K$  area elements. Binary values are: 1 if there is at least one registered occurrence, and 0 otherwise. The symbol  $NA$  (*Not a number*) is assigned to missing values.

---

**Require:**  $\hat{b}$  and  $\hat{i}$

```
for (i := 1 to i == K ; i + +) do
  if  $\hat{b}[i] == 1$  then
    if  $\hat{i}[i] == 1$  then
       $R[i] \leftarrow 1$ 
    else
       $R[i] \leftarrow 0$ 
    end if
  else
     $R[i] \leftarrow \text{NaN}$ 
  end if
end for
```

---

263 the probability of  $X$  and  $Y$  is unknown and it is informed only by nearby sites. If on the other  
264 hand, the background information exists, but there is no known occurrence (i.e. a *relative absence*  
265 ) of  $Y$  at area  $i$ , the probability of occurrence for  $Y$  will depend on the presence of  $X$  as well as its  
266 nearby areas. In this sense, the probability of occurrence of a taxon (e.g. species) depends on the  
267 presence, its relative absence, its sampling effort and the nearby areas where the taxon is present.  
268 The next section shows two practical examples.

### 269 3. Applications

270 To show the capabilities of the framework we chose two examples for predicting presences. The  
271 first involves predicting the presence of pines, that is, occurrences of the class *Pinopsida* as the pro-  
272 cess  $P_Y$  (*Pines*) using the available botanical records and occurrences of the kingdom *Plantae* as  
273 the sampling process  $P_X$  (*Plants*). The second example predicts the presence of a relatively abun-  
274 dant family of flycatchers (family: *Tyrannidae*) as the process  $P_Y$  (*Tyrannids*), using the available  
275 records of birds (class *Aves*) as the sampling process  $P_X$  (*Birds*). In both cases we chose *Elevation*  
276 and *Precipitation* as the scenopoetic variables for process  $P_Y$  and *Distance to roads* and *Popula-*  
277 *tion density* as the anthropological variables for process  $P_X$ . Following the model specification in  
278 equations A.7 and A.8 (supplementary materials Appendix A) The model for the examples of *Pines*  
279 and *flycatchers* is defined as the joint Bernoulli process.

$$\begin{cases} [2]\text{logit}(ToI)_k = \beta_{Y_0} + \beta_{Y_1}(\text{Elevation})_k + \beta_{Y_2}(\text{Precipitation})_k + S_Y + Z_Y \\ \text{logit}(\text{Sample})_k = \beta_{X_0} + \beta_{X_1}(\text{Population density})_k + \beta_{X_2}(\text{Distance to roads})_k + S_X + Z_X \end{cases} \quad (3)$$

280 Where the word *ToI* indicates that the equation is used for the taxon of interest (i.e. pines or fly-  
281 catchers) and *Sample* indicates that the equation is valid for the sampling effort (i.e. plants or  
282 birds).

Table 1: Definitions of the used terms and symbols

| Symbol / term                             | Definition                                                                                                                       |
|-------------------------------------------|----------------------------------------------------------------------------------------------------------------------------------|
| response vector                           | vector input, each entry could be a presence, absence or missing data                                                            |
| occurrence                                | a presence entry (1) in a response vector                                                                                        |
| relative absence                          | entry for absence (0), relative to the presence of an external response vector                                                   |
| missing observation                       | an entry (N.A) in a response vector with no information about presence or relative absence                                       |
| $Y$                                       | response vector of the taxon of interest                                                                                         |
| $X$                                       | response vector of sample observations                                                                                           |
| $\tilde{Y}$                               | missing observations contained in the response vector ( $Y$ ). These values are parameters and are sampled by the MCMC procedure |
| $\tilde{X}$                               | missing observations contained in the response vector ( $X$ ). These values are parameters and are sampled by the MCMC procedure |
| $P_Y$                                     | latent variable for ecological process                                                                                           |
| $P_X$                                     | latent variable for sampling effort process                                                                                      |
| $r_Y$ or ( $R_Y$ )                        | random effect (latent process) for the ecological process                                                                        |
| $r_X$ or ( $R_X$ )                        | random effect (latent process) for the sampling process                                                                          |
| $S$                                       | spatial process, a component of the random effect                                                                                |
| $Z$                                       | unstructured random effect, normal distributed                                                                                   |
| target ( $\dot{\mathbf{i}}$ )             | input (presence-only) data, used by the choosing principle to derive the response vector of the ecological process ( $Y$ )       |
| informative sample ( $\dot{\mathbf{x}}$ ) | input (presence-only) data, used by the choosing principle to derive the response vector of the sample process ( $X$ )           |
| background ( $\dot{\mathbf{b}}$ )         | input (presence-only) data used by the choosing principle to define entries of relative absence or missing data                  |

283 *3.1. Study region*

284 Both models were fitted to data from the same study region. The region comprises the inland area  
285 of a circular polygon centered in central-eastern Mexico at 19N –97E with radius of 2° (ca.~ 200  
286 km). The area covers approximately 112,000 km<sup>2</sup> and intersects several Mexican states including:  
287 Veracruz, Puebla, Tlaxcala, Hidalgo, Mexico City, Morelos and Oaxaca (see figure 2 (i)). It includes  
288 heterogeneous landscapes with variability in biodiversity, geomorphological and climatic features.  
289 The region also includes distinct biomes such as: coastal dunes, chaparrales, mesophyl forests,  
290 evergreen rainforest, grasslands, mangroves, broad leaf forests and coniferous forests (Rzedowski,  
291 2006) and (INEGI, 2015). The circular polygon was intersected on a grid of 4 km spatial resolution  
292 to obtain a lattice  $\mathbb{W}$  composed of 4061 areal units. This lattice was used to define the spatial  
293 structure in models I, II and III.

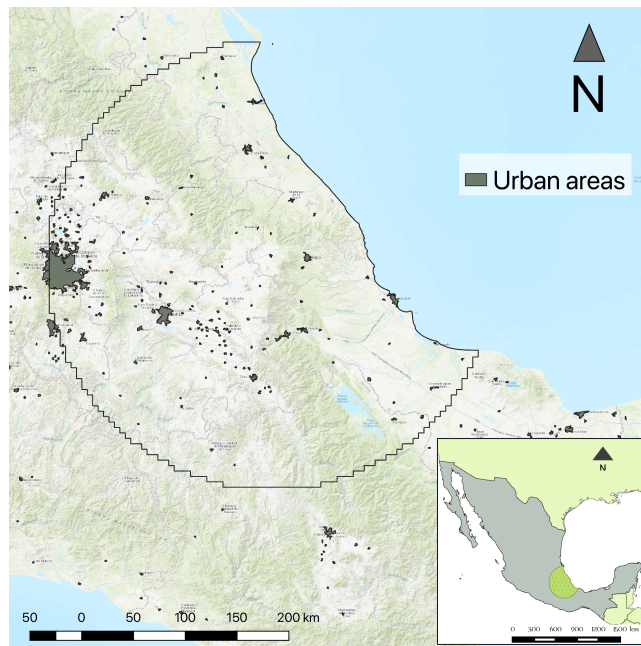

Figure 2: A map showing the study area (overlaid semicircular polygon) over central Mexico. Important cities are shown as grey polygons scattered across the area. Greener areas represent higher vegetation cover. The basemap used as background was obtained from the ESRI topographic tiling service.

### 294 3.2. Occurrence data

295 For the presence-only data we used the available GBIF occurrence data (GBIF Secretariat, 2015)  
296 registered before January 2015, constrained to the region  $\mathbb{W}$ . The raw data was downloaded from  
297 the GBIF portal with the catalog id: DOI:10.15468/dl.oflvla . Upon downloading, we performed  
298 a minimal data cleansing to remove records with missing information in any of the seven taxo-  
299 nomic ranks (i.e. kingdom, phylum, class, order, family, genus and species), acquisition date and  
300 collection code. We kept occurrences with identical coordinates as, historically, these occurrences  
301 might represent distinct different records collected in a common study area. Further information  
302 of this dataset, including all data attributions can be found in (GBIF.org, 2016).

303 We aggregated the occurrence data following the *choosing principle* described in subsection 2.2  
304 to obtain response variables  $\mathbf{y}, \mathbf{x}$  according to each example. The aggregation was by the class  
305 *Pinopsida* and kingdom *Plantae*, in the *Pines* example and, by the family *Tyrannidae* and class  
306 *Birds* for the *Tyrannids* case. Both examples used all known living records (*Life*) as background  
307 signal  $\hat{\mathbf{b}}$ . The taxonomic classification structure used was the GBIF Taxonomic Backbone (GBIF  
308 Secretariat, 2017).

### 309 3.3. Treatments for missing data

310 To assess the impact of using missing information in the prediction accuracy of the framework, we  
311 established two different treatments for fitting each model on each example. Recalling that both  
312 response vectors  $Y$  and  $X$  have entries of presence, relative absence and missing data, we defined  
313 the following treatments:

- 314 • treatment  $i$ : response vectors for the ToI ( $Y$ ) and the sample ( $X$ ) have missing data (i.e.  $\tilde{X} \neq$   
315  $\emptyset \neq \tilde{Y}$ ).
- 316 • treatment  $ii$ : only the sample response vector ( $X$ ) has missing data. That is,  $\tilde{X}$  is the only  
317 source of missing information.

318 The motivation of using treatments is that they can serve as a middle hypothesis to assess the  
319 performance of the framework under scenarios with different proportions of missing data. The  
320 recommended scenario for use in practical applications is to use treatment  $i$ . We used the ROC-  
321 AUC estimate to measure the model's performance within treatments. Using this estimate as an  
322 absolute measure between models may lead to wrong conclusions. For example, treatment  $ii$  im-  
323 plies that all the absences of  $Y$  are real and the sample  $X$  provides no information in the data  
324 augmentation methodology and therefore resulted in lower variance. This may lead to the con-  
325 clusion that treatment  $ii$  performed better, and has greater predictive accuracy than treatment  $i$ .  
326 This conclusion would be true only under the assumption that the absences of the sampling effort  
327 are in fact true absences, which, in the case of presence-only data is false. Therefore, the com-  
328 parison of presence-only models using the AUC-ROC estimate is only valid as a relative measure  
329 within models that used the same data, as it penalises models that estimate potential distributions

330 (e.g treating absences as missing information) whilst favouring those that model realised distribu-  
331 tions those where absences are informative) (Jiménez-Valverde, 2012). Comparing the AUC makes  
332 sense only when they are conditioned to a specific treatment and not between treatments.

### 333 3.4. *Explanatory variables*

334 The elevation data used were obtained from the Global Relief Model *ETOPO1* at 1 arc-minute res-  
335 olution (Amante and Eakins, 2009). The precipitation data were obtained from the World Climatic  
336 Data *WorldClim* version 2 (Fick and Hijmans, 2017). The original data are composed in a raster  
337 model with c.a 1 km spatial resolution averaged from the years 1970 to 2000. The raster data were  
338 aggregated (by mean) to a scalar value for each areal unit in the spatial lattice equivalent to a spatial  
339 resolution of 4 km. This approach was used for the raster data. The distance to road dataset was  
340 generated in two steps. First we rasterised the National Road Network for Mexico (*Red Nacional de*  
341 *Caminos* (RNC) INEGI, Instituto Mexicano del Transporte and Gobierno de Mexico (2014), scale:  
342 1 : 250000) at 1 km spatial resolution. Later, we used this raster dataset to calculate its proximity  
343 to the closest road (pixels flagged as road) using the function `gdal_proximity` delivered as a stan-  
344 dalone command-line utility from (GDAL/OGR Contributors, 2018). The road network data were  
345 obtained from: Vázquez (2018). The population dataset was obtained from the WorldPop project  
346 (Sorichetta et al., 2015) for the year 2010. The dataset consists of population counts on each areal  
347 unit, each with a spatial resolution of 3 arc-seconds (c.a 100 m).

### 348 3.5. *Data preprocessing*

349 The occurrences, scenopoetic and anthropological data were spatially overlaid and aggregated on  
350 each areal unit of  $\mathbb{W}$ . The aggregation method differed according to the data type. Mean and stan-  
351 dard deviation were used for continuous variables, mode for categorical variables and the logical  
352 AND for binary data ( $\mathbf{y}$ ,  $\mathbf{x}$  and  $\mathbf{b}$ ). The data pipeline for processing the data was undertaken with  
353 *Biospytial* (Escamilla Molgora et al., 2020) a geospatial knowledge engine for processing environ-  
354 mental data <https://github.com/molgor/biospytial>.

### 355 3.6. *Inference and prediction*

356 We used a customised version of the R package *CarBayes* (Lee, 2013) and adapted it to fit mod-  
357 els I, II and III. It includes a wrapper for easily fitting SDMs using one of the three models pro-  
358 posed using any type of fixed effects. The code is available from: [https://github.com/molgor/](https://github.com/molgor/CARBayeSDM)  
359 *CARBayeSDM*. The package fits the model with a Markov Chain Monte Carlo (MCMC) method using  
360 a combination of Gibbs sampling and the Metropolis-adjusted Langevin Method (MALA), (Roberts  
361 and Tweedie, 2006). The posterior distributions were sampled by running 10000 iterations (using  
362 5000 for burn-in) and a thinning interval of 5. Prediction for sites with missing information was  
363 done by sampling the posterior distributions of  $\tilde{X}$  and  $\tilde{Y}$ . This same configuration was used in  
364 models I, II and III.

### 365 3.7. Comparison between models

366 Models I, II and III were compared with the *Deviance Information Criterion* (DIC) (Spiegelhalter  
367 et al., 2002). The DIC accounts for the number of parameters used and the likelihood of the ob-  
368 served data, given the statistical model assumed to be generating the data. The DIC is a generali-  
369 sation of the Akaike information criterion (AIC) for hierarchical models, both measure the quality  
370 of the models in terms of their accuracy and parsimony. The DIC also serves as a Bayesian-based  
371 model selection tool. Model *A* is preferred to model *B* if its DIC value is lower than the one for *B*  
372 (i.e  $DIC_A < DIC_B$ ).

### 373 3.8. Comparison against Maxent

374 As mentioned in the introduction, we used the maximum entropy (MaxEnt) algorithm (Phillips  
375 et al., 2006) as a benchmark to compare the prediction accuracy of the proposed models. Contrary  
376 to models I, II and III, MaxEnt does not have a hierarchical specification and, therefore, calculat-  
377 ing a DIC for model comparison is not possible. To address this limitation, we used a *k-fold* ( $k = 7$ )  
378 cross-validation methodology for measuring the quality of the predictions of all models. That is,  
379 on each fold, 1/7-th of the data was excluded from the fitting process and used as testing data to  
380 be compared against the corresponding predictions. This procedure was performed seven times,  
381 until every observation had a corresponding predicted value. We then used the *receiver operator*  
382 *characteristic* (ROC) curve and its area under the curve (AUC) (Fielding and Bell, 1997) as a mea-  
383 sure of prediction accuracy. The same seven-fold cross validation was performed for models I, II  
384 and III with the difference that the excluded data were treated as missing data. The ROC / AUC val-  
385 ues, as well as their corresponding 95% confidence intervals were calculated with the R package  
386 pROC (Turck et al., 2011).

387 Recalling that the proposed models are based on a spatial lattice structure (i.e. a CAR-based  
388 model), the spatial variation is modelled on a finite set of areal units. In the following case studies,  
389 these units were defined as square cells on a regular grid of approximately 4 km of spatial resolu-  
390 tion. To make a fair comparison, we used the same spatial resolution and environmental values  
391 for fitting the MaxEnt models. Additionally, the background data (i.e. *pseudo-absences* in the Max-  
392 Ent jargon) used for fitting MaxEnt were obtained from locations with sampling observations but  
393 with no record of the taxon of interest, similarly to the sample selection bias for background data  
394 proposed by (Phillips et al., 2009). In other words, the *choosing principle* was also applied to the  
395 MaxEnt models resulting in the same input for all models (only valid for component *Y* (presence)  
396 of models I, II and III).

#### 397 3.8.1. MaxEnt optimisation

398 MaxEnt allows different configurations for model fitting. The most important are: the regularisa-  
399 tion factor (reg) and the composition of mathematical transformations of the covariates, so-called  
400 *features* (see: Merow et al. (2013)). These features are equivalent to functions of the trend (i.e. they  
401 modify the fixed effect). To optimise the predictions of MaxEnt, we ran the 7-fold cross validation

402 using different combinations of regularisation factors ( $\text{reg} \in (0.1, 150)$ ) and feature functions. In  
403 the case of the features, we used single and paired combinations of each of the following types:  
404 linear (l), quadratic (q), product(p), threshold (t) and hinge (h). The total number of different  
405 combinations (i.e models) for MaxEnt was 2250. The model was fitted with the R package maxnet  
406 (Phillips et al., 2017).

## 407 **4. Results**

### 408 *4.1. Presence of Pines*

409 We performed the methods described in section 2.2 to obtain response variables for Pines (*Pines*)  
410 and the botanical sample (*Plants*) using a geographical lattice  $\mathbb{W}$  composed of 4060 cells (or unit  
411 areas). For the presence observations, 341 (8.4%) cells have known occurrences (class *Pinopsida*),  
412 2559 (63%) have relative absences and 1160 (28.6%) are unknown (locations with missing observa-  
413 tions). For the sample observations (botanical records), 2900 (71.4%) cells have known occurrence,  
414 430 (8.4%) have relative absence and 730 (18%) unknown information (missing data).

415 The optimal MaxEnt, in terms of its higher predictive accuracy measured by the AUC-ROC was the  
416 one with a hinge feature type (nknots=50) and regularisation factor of 0.5. This combination, how-  
417 ever, achieved the lowest predictions AUC of  $0.67 \pm (0.64, 0.7)$  95% confidence interval (CI), when  
418 compared with models I, II and III (see figure 4a). Results from the best MaxEnt model and Models  
419 I, II and III are described in table 2.

420 For the treatment *i* (i.e. with both sources of missing information, see section 3.3), Model III (the  
421 one with correlated spatial structures) resulted to be the best ranked, that is, it achieved the lowest  
422 *Deviance Information Criterion* (DIC of 3440.2, see table 2). The predictive accuracy of this model,  
423 measured as the area under the ROC curve (i.e. AUC-ROC) was the highest of all three models (see  
424 figure 4a). The AUC of the three models fell within a common 95% credible interval of [0.8,0.86],  
425 that is, the predictive accuracy of models I, II and III was not significantly different.

426 Treatment *ii* (i.e. the one with no missing data in the sample effort component) produced slightly  
427 different results. In this case, Model I (independent spatial effects) was the best ranked by achiev-  
428 ing the lowest DIC value (3421.2). The AUC in all models was higher than those on treatment *i*.  
429 However, in a similar way all of these values fell within a common 95% credible interval of [0.85,  
430 0.89] (see supplementary materials fig: B.11). Possible reasons for this effect are explained in  
431 the next section. Additionally, the ROC curves in all models show similar variance described as  
432 the envelope of the ROC curve. Figures of this has been left to the supplementary materials (fig:  
433 B.11). The framework allows testing the significance the model's parameters, in the same form as  
434 a Bayesian linear regression. In this sense, the variable *distance to road* was found to be the only  
435 significant covariate common to models I, II and III. That is, the zero is out of the 95% credible  
436 intervals (CI) of its posterior distribution. The scenopoetic variables (elevation and precipitation)  
437 were only significant in Model II. The selection of these specific covariates was based solely to  
438 demonstrate the capabilities of the model. As such, other covariates with stronger significance  
439 may be used further applications.

Table 2: Comparison of the presence-only models: Independent Spatial Components (Model 1), Common Spatial Component (Model 2), Correlated Spatial Components (Model 3) and Maximum Entropy (MaxEnt) for the presence of Pines (class *Pinopsida*) using botanical records (kingdom: *Plantae*) as sample effort. A 7-fold cross validation was performed to calculate the area under the receiver-operating characteristic curve (ROC-AUC) as a measure of quality for each model. Models with the  $\star$  symbol were fitted using only missing data from  $X$  (sample), i.e. treatment *ii*.

|           | DIC           | ROC-AUC | 95% C.I      | DIC $\star$   | ROC-AUC $\star$ | 95% C.I $\star$ |
|-----------|---------------|---------|--------------|---------------|-----------------|-----------------|
| Model I   | 3517.6        | 0.835   | [0.81, 0.86] | <b>3421.2</b> | 0.874           | [0.85,0.89]     |
| Model II  | 3665.9        | 0.826   | [0.8,0.85]   | 3647.9        | 0.877           | [ 0.86, 0.89]   |
| Model III | <b>3440.2</b> | 0.832   | [0.80,0.85]  | 3505.9        | 0.876           | [0.86,0.89]     |
| MaxEnt    | –             | –       | –            | –             | 0.67            | [0.64,0.7]      |

#### 4.1.1. Spatial results

Figure 3 shows the mean predicted latent surfaces for the presence of Pines  $P_Y$  and sampling effort  $P_X$  in all three models (left and right columns resp.).  $P_X$  shows higher probability of occurrence than  $P_Y$  across all the region. This is consistent in the three models. In contrast, the presence  $P_Y$  revealed clustered patterns of high probability (figure 3). Of particular interest is the central zone that shows a high probability of occurrence. This area corresponds to the contact between the Eastern Sierra Madre and the Volcanic Axis and is of high elevation and high precipitation. In contrast, the MaxEnt model (fig: 3, bottom left panel) produced a smoother surface. The orographic features are more defined and the clustered patterns for presence are lost. Visual comparison between the models is difficult because of their similarity. However, in treatment *ii* (only one source of missing observations), Model II shows the compromise of estimating the sample  $P_X$  to satisfy a common spatial component with  $P_Y$ . In Model III, the median correlation obtained from the cross variance ( $\Sigma$ ), between the presence of pines ( $P_Y$ ) and the sampling effort ( $P_X$ ), was 0.97 with (0.9, 0.99) 95% credible interval. This result is consistent with the fact that the taxon of interest (i.e. pines) is totally contained in the sampling effort (i.e. plants). The complete estimates summary can be checked in supplementary section Appendix B.

#### 4.2. Results for the Presence of Flycatchers (family Tyrannidae)

This example was performed in the same study region (i.e., across the lattice  $\mathbb{W}$ ). However, the data availability was significantly different and, therefore, the results were also different. In this example we obtained 596 (14.6%) cells with known occurrences of flycatchers, 368 (9.1%) with relative absences and 3096 (76.2%) of unknown or missing information. The occurrences for the sample (birds in general) was composed of: 990 (24.4%) known occurrences, 2340 (57.6%) relative absences and 730 (18%) missing data.

The optimal MaxEnt, in terms of its higher predictive accuracy measured by the AUC-ROC was the one with a combination of feature type of linear and threshold (nknots=50), and a regularisation factor of 0.7. The resulting optimal combination achieved a ROC-AUC of  $0.61 \pm (0.59, 0.63)$  95% confidence interval (CI). The optimal parameter combination resulted to be equivalent to models I and III in terms of its predictive accuracy. That is, all the MaxEnt models are covered by the 95% confidence intervals of the ROC-AUC estimation for models I, II and III. Nevertheless, Model II (the



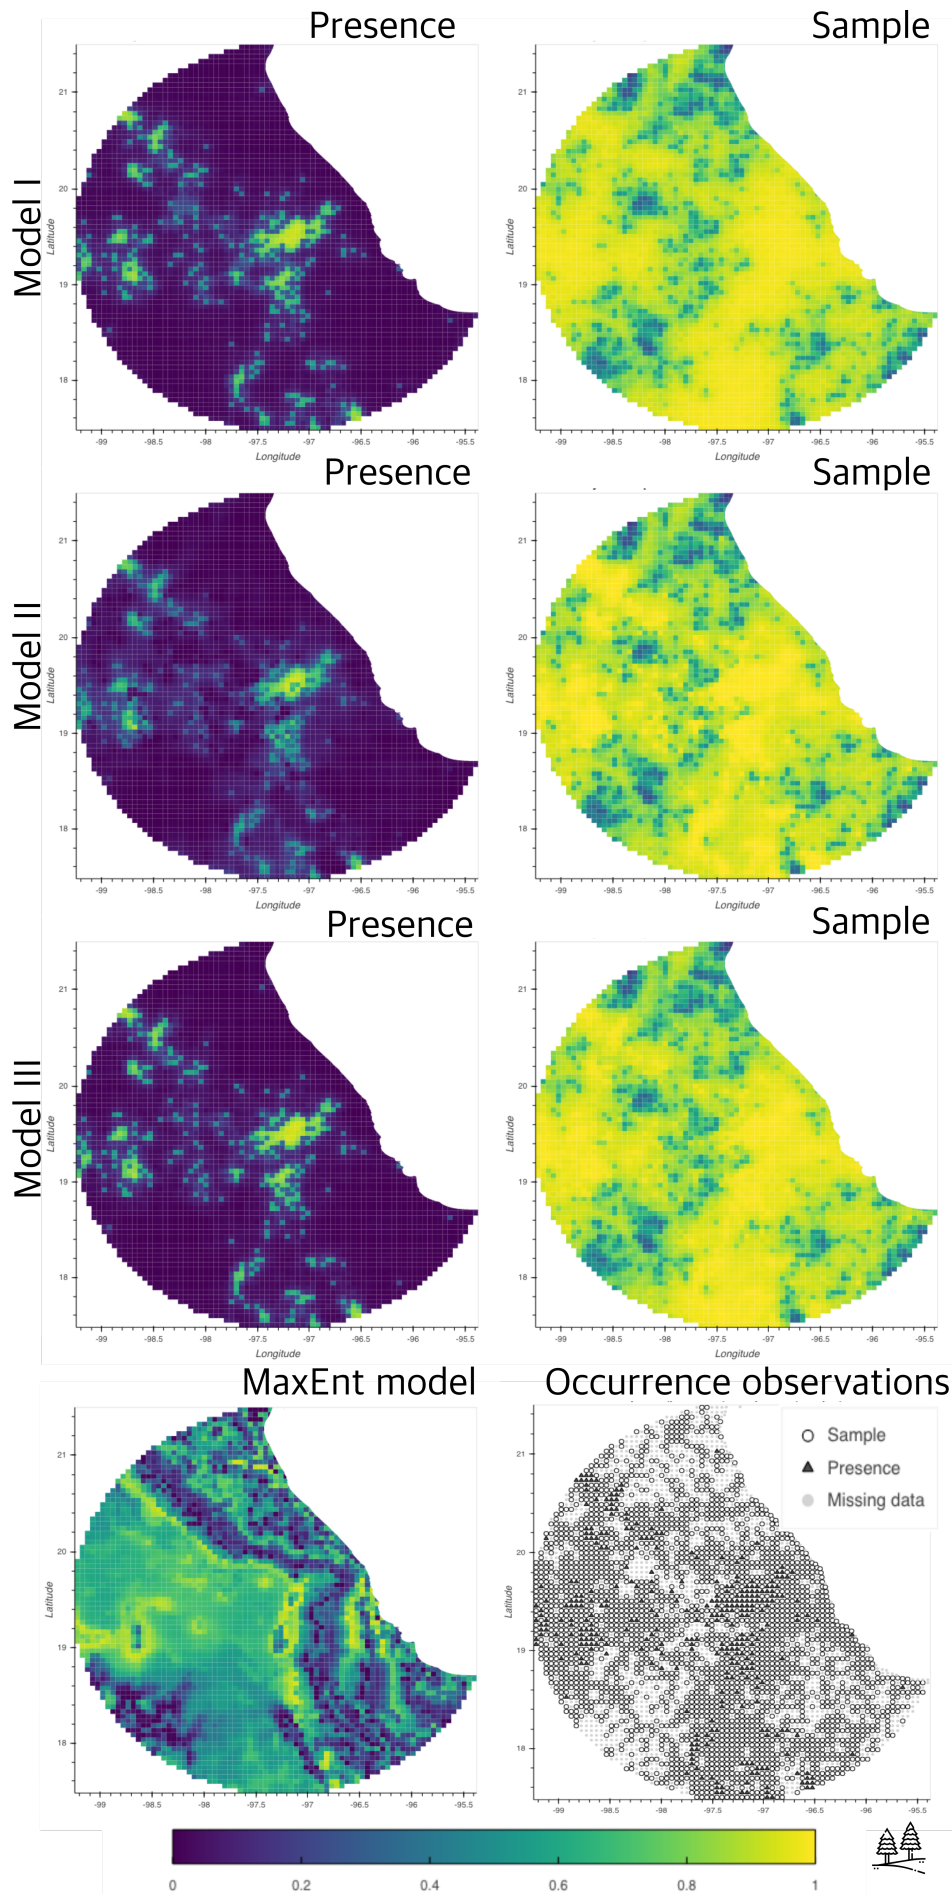

Figure 3: Comparison of models I, II and III against the maximum entropy algorithm (bottom left panel). The maps displayed here corresponds to the posterior mean probability for the three models using observations of pines as presence (panels on left) and botanical records (panels on right) as the sampling process. The bottom right panel shows the observations used to fit the models.

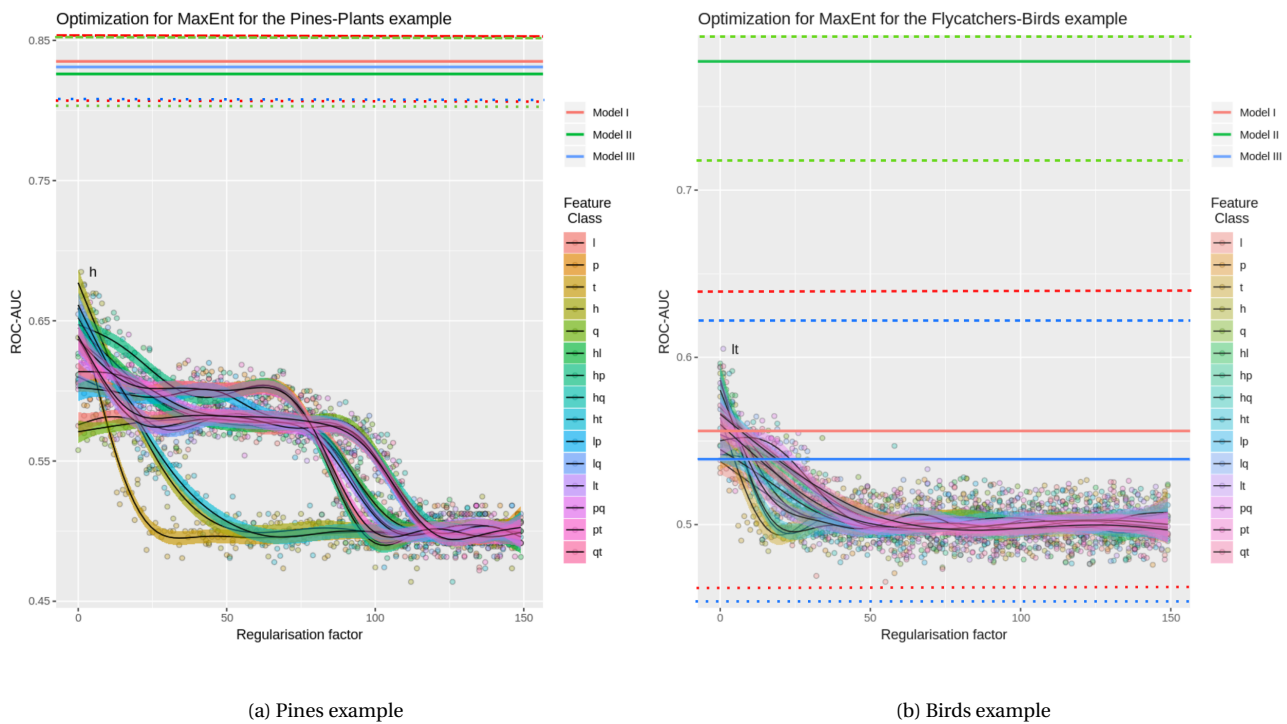

Figure 4: Area under the receiver operating characteristic curve (AUC-ROC) for the different models of the pines example (left panel) and the birds example (right panel). The dots in colours represent a MaxEnt models using different parameters of regularisation (x-axis) and feature type (vertical legend). The values in the y-axis correspond to the resulting AUC-ROC value according to that specific pair of parameters. The AUC-ROC values of models I (red), II (green) and III (blue) are shown as horizontal lines. Solid lines represent the mean AUC-ROC values for models I, II and III, while dotted and dashed lines represent their respective lower and upper (95%) confidence intervals.

469 one with a common spatial random effect) resulted to be significantly more accurate than the rest  
 470 of the models. Figure 4b shows a comprehensive view of the aforementioned results. Additionally,  
 471 a quantitative summary of these results is described in table 3.

472 In treatment *i* (i.e. missing data in both response vectors, the one for presence and the one for  
 473 sample), Model III (correlated spatial components between the ecological process and the sam-  
 474 pling effort) was the best ranked, achieving the lowest DIC value (3905), similarly to the Pines  
 475 example. However, its accuracy in terms of ROC-AUC was close to random classification, reaching  
 476 an AUC of 0.54 with  $\pm(0.45, 0.62)$  at 95% CI. Model I (independent spatial effect for the ecological  
 477 and the sampling components) obtained similar values of ROC-AUC ( $0.56 \pm (0.47, 0.64)$  at 95% CI).  
 478 In contrast, Model II obtained the highest predictive accuracy ( $0.77 \pm (0.71, 0.84)$ ) with a DIC of  
 479 3905, second in rank. (see figure 4b); In addition, models I and III achieved a low predictive power  
 480 compared to the benchmark model (MaxEnt).

481 Treatment *ii*, (i.e only one response vector ( $X$ ) with missing information) showed contrasting re-  
 482 sults. Although model III (correlated components) ranked best, in terms of a lowest DIC (3331.1),  
 483 its AUC was  $0.95 \pm (0.94, 0.96)$ . Model I (independent spatial components) followed with an AUC  
 484 of  $0.89 \pm (0.88, 0.91)$ . Model II, could not obtain valid posterior distributions, as its log-likelihood  
 485 diverged to  $-\infty$ . We discuss possible reasons and circumventing strategies in the next section.

486 All results are shown in table 3. Based solely on the DIC, Model III was ranked first in both treat-  
 487 ments. However, in cases with large proportions of missing data (as in treatment *i* with 76.2% cells)

488 the prediction accuracy (ROC-AUC) was low. This effect highlights the importance of selecting in-  
 489 formative missing data as well as the type of model to use. These issues are explored further in the  
 490 discussion section.

491 The covariate *Distance to roads* was found to be significant in models I and III. The rest (elevation,  
 492 precipitation and population count) were not significant in all three models. The selection of these  
 493 specific covariates was based solely to demonstrate the capabilities of the model. As such, other  
 494 covariates with stronger significance may be used.

Table 3: Comparison of the presence-only models: Independent Spatial Components (Model 1), Common Spatial Component (Model 2), Correlated Spatial Components (Model 3) and Maximum Entropy (MaxEnt) for the presence of the family *Tyrannidae* using birds as sample (class: *Aves*). A 7-fold cross validation was performed to calculate the area under the receiver-operating characteristic curve (ROC-AUC) as a measure of quality for each model. Models with the ★ symbol were fitted using only missing data from  $X$  (sample), i.e. treatment *ii*.

|           | DIC           | ROC-AUC     | 95% C.I       | DIC★          | ROC-AUC★    | 95% C.I★    |
|-----------|---------------|-------------|---------------|---------------|-------------|-------------|
| Model I   | 4445.8        | 0.556       | [0.47, 0.64 ] | 5607.3        | 0.89        | [0.88 ,91]  |
| Model II  | 4251.1        | <b>0.77</b> | [0.71, 0.84]  | N.A.          | N.A.        | N.A.        |
| Model III | <b>3905.0</b> | 0.54        | [0.45, 0.62]  | <b>3331.1</b> | <b>0.95</b> | [0.94,0.96] |
| MaxEnt    | –             | –           | –             | –             | 0.61        | [0.59,0.63] |

#### 495 4.2.1. Spatial results

496 Figure 5 shows the mean predicted latent surfaces for the presence of flycatchers  $P_Y$  (*Tyrannids*) and  
 497 relative sample  $P_X$  (*Birds*) in all the three models (left and right columns resp.). Model I presents a  
 498 clear difference between  $P_Y$  and  $P_X$  (figure 5, first row). In this case,  $P_Y$  appears more smooth with  
 499 patches of lower probability, although always with probability higher than 0.2. The surface  $P_X$  in  
 500 model I (fig: 5, top right panel) has clear shaped patterns with contrasting probabilities between  
 501 interior regions (*pocket shapes*). This feature is present in both surfaces of model II (fig:5, second  
 502 row) and model III (fig:5, third row) The fixed effects (covariates) for  $P_X$  and  $P_Y$  are close to zero,  
 503 therefore, the spatial variation is driven only by the common structure  $S$ . In the case of model III,  
 504 the sample surface  $P_X$  presents greater connectivity and higher probabilities in places with known  
 505 observations. Both surfaces, however, present a similar structure in shapes and patterns.

506 In contrast, the MaxEnt prediction lacks the random spatial effect component. The resulting prob-  
 507 ability surface is determined exclusively by the features used by the covariates. Although is possi-  
 508 ble to distinguish spatial patterns within the region, the predicted probability is in general close to  
 509 uniform random classification (i.e. 0.5). This effect is supported by the obtained AUC-ROC value  
 510 of the cross-validation analysis (0.6) (fig: 4b (a)). In Model III, the median correlation, obtained  
 511 from the cross variance ( $\Sigma$ ) between the presence of flycatchers ( $P_Y$ ) and the sampling effort ( $P_X$ ),  
 512 was 0.996 with (0.993, 0.998) 95% credible interval. As in the latter example, this result is consistent  
 513 with the fact that the taxon of interest (i.e. flycatchers) is totally contained in the sampling effort  
 514 (i.e. birds). The complete estimates' summary can be checked in Appendix C.

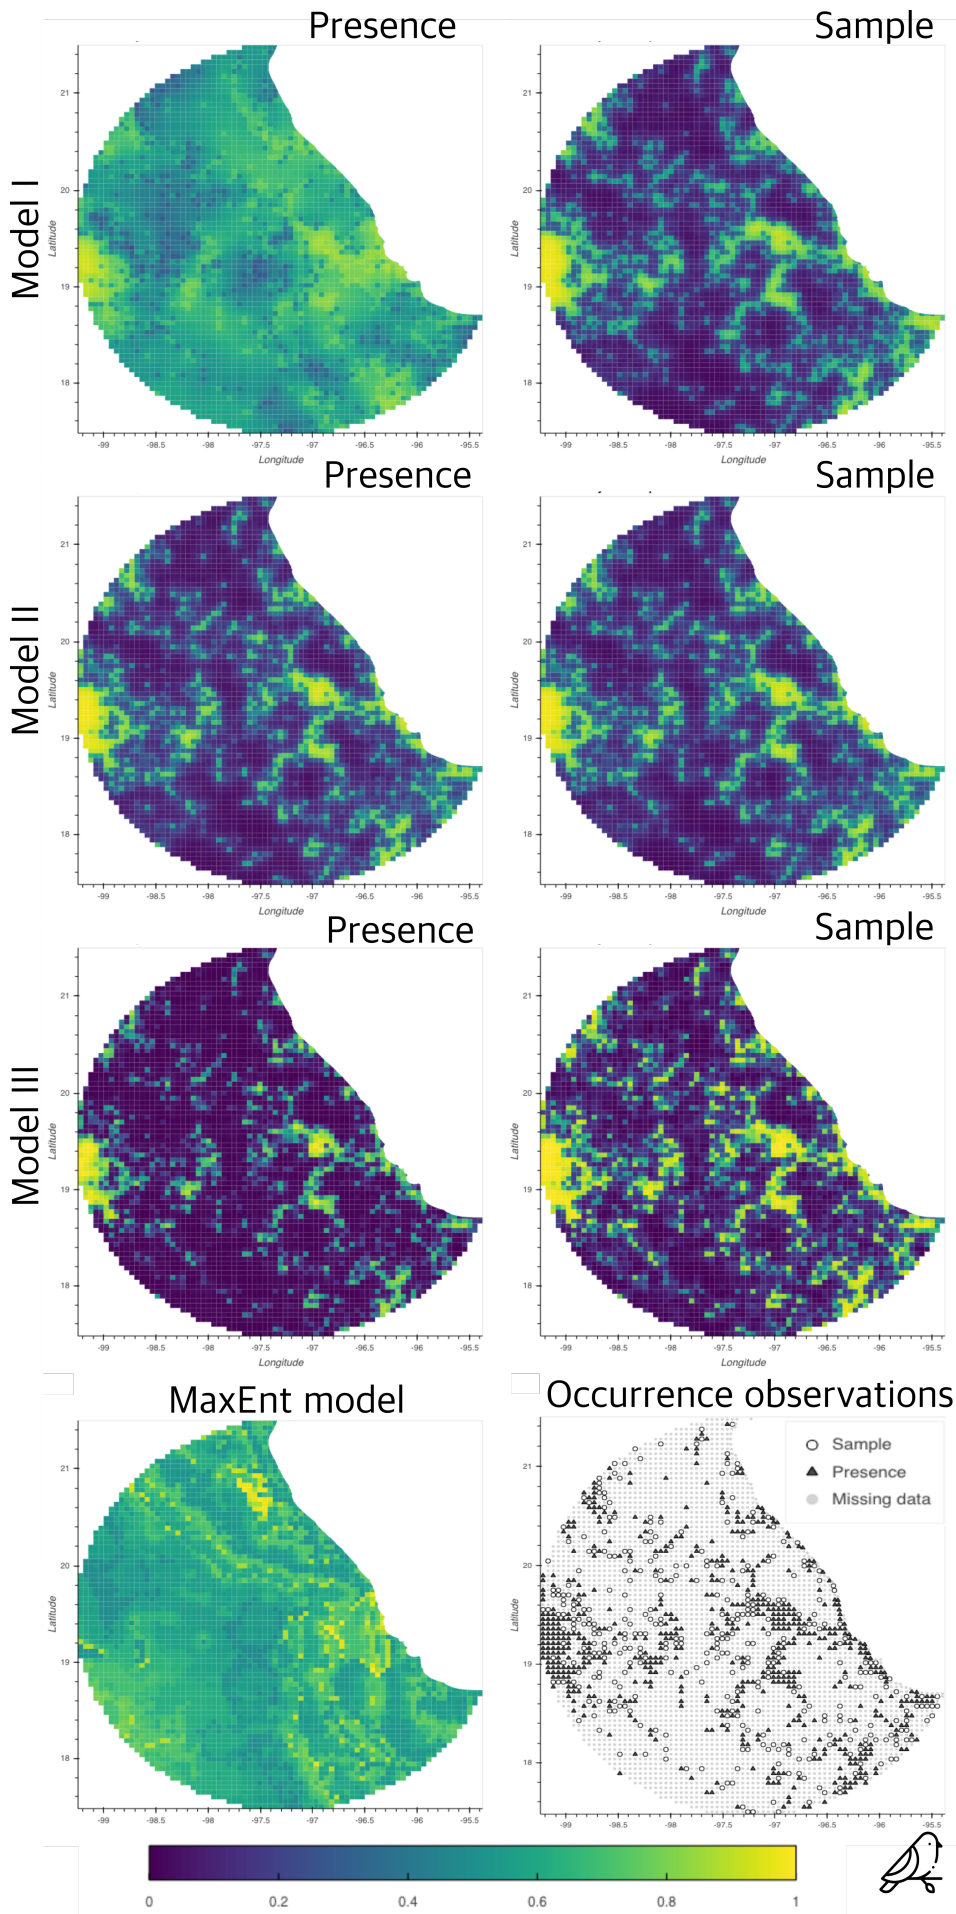

Figure 5: Comparison of models I, II and III against the maximum entropy algorithm (bottom left panel). The maps displayed here corresponds to the posterior mean probability for the three models using observations of flycatchers as presence (panels on left) and observations of birds records (panels on right) as the sampling process. The bottom right panel shows the observations used to fit the models.

## 515 5. Discussion

516 The bivariate CAR modelling framework uses an additional source of information, apart from the  
517 presences of the target species. This extra information comes from sampling observations related  
518 to other species and other taxa that, according to the modeller, give complementary information  
519 relative to the occurrence of the taxon of interest (ToI). The framework relies on three fundamen-  
520 tal concepts: *i*) the sampling effort as complementary information for inferring the probability of  
521 presence, *ii*) the spatial autocorrelation structure for determining the variability and occurrences  
522 likelihood across the landscape, and *iii*) the *choosing principle*, a mechanism for determining pres-  
523 ences, relative absences and missing data from presence-only records. Both examples showed  
524 that, at least one of the three proposed models outperformed MaxEnt. The results in tables 2 and  
525 3 show that the models' goodness-of-fit statistic (i.e. DIC) and predictive accuracy increased in  
526 treatment *ii*, that is, when the absence of records were treated as real absences. This is expected  
527 because assuming missing data as real absences reduces uncertainty.

528 These results show that the proportion of missing data plays a fundamental role in the predictive  
529 capability of the model. This effect is recognised in the flycatchers example, where the propor-  
530 tion of missing observations is much higher (76% of the total number of regions) compared to  
531 presences and relative absences. In this case, models I and III produced low predictive accuracy,  
532 similarly to MaxEnt, with an AUC-ROC of near 0.6 (i.e., close to random classification). In contrast,  
533 model II, although ranked second in terms of DIC, achieved the highest predictive accuracy (AUC-  
534 ROC). This result is also supported by the high number of missing data (increased uncertainty)  
535 and reduced number of spatial parameters to fit. In terms of models' parsimony, one shared spa-  
536 tial latent effect (model II) has less parameters to fit compared with two spatial effects in the case  
537 of models I and II.

538 The three proposed models impose different restrictions on how the spatial autocorrelation struc-  
539 ture affects the probability of a species to occur. The more complex the spatial structure is, the  
540 more presence-only observations (and less missing data) are needed. This can be modulated by  
541 the amount of missing data with respect to the relative absences determined by the sampling effort  
542 observations and the choosing principle. Consequently, using an appropriate informative sample  
543 becomes crucial for obtaining accurate inferences and predictions. This finding highlights inter-  
544 esting paths for future research: one related to the selection of informative observations for the  
545 sampling effort process, and the other for different choosing principles.

546 Model II may be a better alternative for taxa with sparse spatial distributions and large proportion  
547 of missing data. Nevertheless, model II presented problems with identifiability in treatment *ii* (i.e.  
548 missing data only in the ToI observations and assumed real absences in the sampling process). A  
549 possible reason is that the inference method could not find a suitable compromise in accounting  
550 for a common spatial effect that had two constraints. One, the accountability of residuals of both  
551 processes ( $P_Y$  and  $P_X$ ) and two, the restrictions imposed by the intrinsic CAR model specification.  
552 That is, the sum of the random effect on all the lattice areas should sum one. A possibility to

553 circumvent this last restriction is to specify, instead, a proper CAR model (e.g (Leroux et al., 2000)).  
554 The package CARBayes (Lee, 2013) allows this specification. We recommend the practitioner to  
555 compare the three models accordingly to fit specific needs.

### 556 5.1. *The role of the choosing principle*

557 When presence-only data are used, any choosing principle is inevitably a source of potential bias.  
558 Thus, the research question and the selection of the sampling effort observations play a funda-  
559 mental role in determining the accuracy of predictions. The way relative absences and missing  
560 data are derived implies ecological assumptions that should be kept in mind when one tries to  
561 model species (taxon) distributions. For example, following the *biotic, abiotic, movements* (BAM)  
562 diagram proposed (Soberon and Nakamura, 2009), if the objective is to model the *realised distri-*  
563 *bution*, (i.e., places where the species lives in reality) absences become informative. If on the other  
564 hand, the objective is to model the species' *potential distribution* (i.e. places where it can survive  
565 and thrive due to suitable environmental conditions) absences may constitute missing data. See  
566 equivalent concepts from a SDM approach Jiménez-Valverde et al. (2008).

567 In our framework, we used the sample observations  $X$  together with the *choosing principle* to dis-  
568 criminate between informative absences and missing data. If the sampling effort is chosen to be  
569 informative it can increase significantly the accuracy of predictions (see table 2).

570 The current choosing principle assumes that for every location  $k$ , if the ToI (e.g. species) is not  
571 present, but the sample observation exists ( $X_k = 1$ ), then the ToI is assumed to be absent ( $Y_k = 0$ ).  
572 In some applications this assertion may be incorrect and, if the sample observations  $X$  consist  
573 as well of presence-only data, the bias in false absences can propagate in both processes. This  
574 problem is present in all presence-only methods that tries to account for the sampling bias using  
575 pseudo-absences (e.g. target-background approach of Phillips et al. (2009)), given the intrinsic  
576 bias of the collected data. Ideally, the best way to rank distinct choosing principles, given a ToI, is  
577 using presence-absence data. The proposed choosing principle is not intended to be a general rule  
578 for all species and problems. An it is worth for the modeller to consider other choosing principle in  
579 which relative absences and missing data can be specified from presence-only data. For example,  
580 another type of choosing principle can incorporate information on other species features. For  
581 example movement, since the accessibility of an area can be indicative of poor sampling and its  
582 use has been shown to reduce bias in occurrence data (Monsarrat et al., 2018).

583 We would like also to explore further the role of the taxonomic structure in determining informa-  
584 tive samples. In the examples we used broad and generic groups, jumping from class *Pinopsida*  
585 to kingdom *Plantae*, in the case of Pines, and from family *Tyrannidae* to class *Aves*, in the case of  
586 the flycatchers. We hypothesise that using the immediate parent node of the ToI, according to its  
587 taxonomical classification, could give more accurate models for certain groups. An example of this  
588 could be the use of the family (of the ToI) as sample, if the ToI is a type of genus.

589 In recent years, spatial point process (SPP) models have been proposed to model presence-only  
590 occurrences (see Velázquez et al. (2016) for review).

591 This is a sensible choice of modelling giving that these models are able to represent discrete events  
592 in a continuous space. Recently, authors like (Renner et al., 2015, 2019) proposed a combined  
593 likelihood approach for modelling the spatial dependence using a latent log Gaussian Cox pro-  
594 cess (Møller et al., 1998). Although these models are sound and have been used satisfactory, the  
595 assumptions about the required sample design restrict their application to only specific cases  
596 (Gelfand et al. (2013), Chp. 20 ). Additionally, in SPP models, all information is contained in the  
597 location of the occurrences and separating the sampling effort from the ecological process, can  
598 lead to confounding and identifiability problems. In our opinion the use of spatial lattices (i.e.  
599 Gaussian Markov random fields) for modelling spatial autocorrelation presents a more appropri-  
600 ate alternative for modelling generic species.

### 601 *5.2. Advantages in using this framework*

602 The model is defined in a spatial lattice. The observations occurred on a given area element can  
603 be aggregated to reflect presences or abundances. That is, the model support repeated measure-  
604 ments within areas. In addition, the probabilities for presence in areas that have not been sampled  
605 can be inferred by the neighbouring areas. The method is able to infer places where data availabil-  
606 ity is limited. The model specifies a Bayesian hierarchical model and accounting uncertainties of  
607 the parameters is possible. This brings the possibility to perform hypotheses testing on the pos-  
608 terior sample. As it is a hierarchical model it is possible to perform model selection using the DIC  
609 statistic. The structural components of the models, that is, the ecological process and the sam-  
610 pling effort can be explicitly modelled using different covariates and even feature classes, as the  
611 ones used by MaxEnt. Lastly, the choosing principle provides a flexible form to assign absences  
612 and missing data.

### 613 *5.3. Limitations*

614 Manipulating the spatial random component of the model implies greater computational com-  
615 plexity on the order of  $O(n^3)$  (in its worse scenario). Although, the matrix is sparse and the in-  
616 ference uses optimised numerical methods that can reduce the computational complexity, the  
617 numerical methods involved are more intensive than MaxEnt or other models that are not based  
618 on hierarchical Bayesian inference. This is a limitation for studies that requires extended regions  
619 involving hundreds of thousands of area elements.

620 Another limitation is that the specification of the spatial effect is based on discrete spatial distribu-  
621 tions. This implies that, once the model is fitted, it is not possible to make predictions on observed  
622 regions or data (as opposed to geostatistical models). Also, depending on the specification, a mod-  
623 eler may need the spatial random effect to be continuous in space, instead of over a discrete lattice.  
624 If this is the case we recommend the use of SPP-based models like (Renner et al., 2015, 2019).

## 625 **6. Significance Statement**

626 The presented work provided three alternatives to model the spatial distribution of species using  
627 solely observations of presences. The two case studies showed that, in terms of predictive accu-

628 racy, at least one of the alternatives outperformed the most popular method for modelling species  
629 distributions (i.e MaxEnt).

630 The framework can be applied in a variety of problems where information on species absences is  
631 unknown but data from other species is available. As this approach returns posterior probability  
632 distributions, it provides valuable information for performing spatial analyses, estimating predic-  
633 tions and uncertainties and testing hypotheses related to the model's parameters.

## 634 **7. Data and source code availability**

635 Currently the code and data are stored in the following repository: [https://github.com/molgor/](https://github.com/molgor/CARBayeSDM)  
636 [CARBayeSDM](#). We intend to put the code and data in a long term curated repository such as Dryad  
637 or FigShare.

## 638 **8. Conflicts of interest**

639 The authors declare no conflict of interest.

## 640 **Acknowledgments**

641 This project was jointly sponsored by the Mexican Science and Technology Council (CONACyT)  
642 under the doctoral program: *Becas al Extranjero* and the Faculty of Science and Technology from  
643 Lancaster University. Icons for birds and pines made by Freepik from [www.flaticon.com](http://www.flaticon.com).

## 644 **References**

645 C. Amante and B. Eakins. ETOPO1 1 Arc-Minute Global Relief Model: Procedures, Data Sources  
646 and Analysis. Technical Report March, jan 2009. URL [https://data.nodc.noaa.gov/](https://data.nodc.noaa.gov/cgi-bin/iso?id=gov.noaa.ngdc.mgg.dem:316)  
647 [cgi-bin/iso?id=gov.noaa.ngdc.mgg.dem:316http://www.ngdc.noaa.gov/mgg/global/](http://www.ngdc.noaa.gov/mgg/global/global.html)  
648 [global.html](http://www.ngdc.noaa.gov/mgg/global/global.html).

649 J. Beck, M. Böller, A. Erhardt, and W. Schwanghart. Spatial bias in the GBIF database and its effect  
650 on modeling species' geographic distributions. *Ecological Informatics*, 19:10–15, 2014. ISSN  
651 15749541. doi: 10.1016/j.ecoinf.2013.11.002. URL [http://dx.doi.org/10.1016/j.ecoinf.](http://dx.doi.org/10.1016/j.ecoinf.2013.11.002)  
652 [2013.11.002](http://dx.doi.org/10.1016/j.ecoinf.2013.11.002).

653 J. Besag. Spatial Interaction and the Statistical Analysis of Lattice Systems. *Journal of the Royal*  
654 *Statistical Society. Series B (Methodological)*, 36(2):192–236, 1974. ISSN 00359246. URL [http://](http://www.jstor.org/stable/2984812)  
655 [www.jstor.org/stable/2984812](http://www.jstor.org/stable/2984812).

656 J. Besag, J. York, and A. Mollié. Bayesian image restoration, with two applications in spatial statis-  
657 tics. *Annals of the Institute of Statistical Mathematics*, 43(1):1–20, mar 1991. ISSN 00203157. doi:  
658 [10.1007/BF00116466](http://link.springer.com/10.1007/BF00116466). URL <http://link.springer.com/10.1007/BF00116466>.



- 659 T. Booth. A new method for assesting species selection. *The Commonwealth Forestry Review*, 64  
660 (3):241–250, 1985.
- 661 CONAFOR. Inventario Nacional Forestal y de Suelos 2009 - 2014. *Inventario Nacional de Sue-*  
662 *los*, page 432, 2018. URL [http://www.inegi.gob.mx/prod\\_serv/contenidos/espanol/](http://www.inegi.gob.mx/prod_serv/contenidos/espanol/bvinegi/productos/integracion/especiales/memoriapdf/Memoria_VII_RNE.pdf)  
663 [bvinegi/productos/integracion/especiales/memoriapdf/Memoria\\_VII\\_RNE.pdf](http://www.inegi.gob.mx/prod_serv/contenidos/espanol/bvinegi/productos/integracion/especiales/memoriapdf/Memoria_VII_RNE.pdf).
- 664 J. L. Dickinson, B. Zuckerberg, and D. N. Bonter. Citizen Science as an Ecological Research Tool:  
665 Challenges and Benefits. *Annual Review of Ecology, Evolution, and Systematics*, 41(1):149–172,  
666 dec 2010. ISSN 1543-592X. doi: 10.1146/annurev-ecolsys-102209-144636. URL [http://www.](http://www.annualreviews.org/doi/10.1146/annurev-ecolsys-102209-144636)  
667 [annualreviews.org/doi/10.1146/annurev-ecolsys-102209-144636](http://www.annualreviews.org/doi/10.1146/annurev-ecolsys-102209-144636).
- 668 J. Elith and J. R. Leathwick. Species Distribution Models: Ecological Explanation and Prediction  
669 Across Space and Time. *Annual Review of Ecology, Evolution, and Systematics*, 40(1):677–697,  
670 dec 2009. ISSN 1543-592X. doi: 10.1146/annurev.ecolsys.110308.120159. URL [http://www.](http://www.annualreviews.org/doi/10.1146/annurev.ecolsys.110308.120159)  
671 [annualreviews.org/doi/10.1146/annurev.ecolsys.110308.120159](http://www.annualreviews.org/doi/10.1146/annurev.ecolsys.110308.120159).
- 672 J. Elith, C. H. Graham, R. P. Anderson, M. Dudik, S. Ferrier, A. Guisan, R. J. Hijmans, F. Huettmann,  
673 J. R. Leathwick, A. Lehmann, J. Li, L. G. Lohmann, B. A. Loiselle, G. Manion, C. Moritz, M. Naka-  
674 mura, Y. Nakazawa, J. M. Overton, A. T. Peterson, S. J. Phillips, K. Richardson, R. Scachetti-  
675 Pereira, R. E. Schapire, J. Soberon, S. Williams, M. S. Wisz, and N. E. Zimmermann. Novel  
676 methods improve prediction of species’ distributions from occurrence data. *Ecography*, 29(2):  
677 129–151, 2006. ISSN 09067590. doi: 10.1111/j.2006.0906-7590.04596.x.
- 678 J. M. Escamilla Molgora, L. Sedda, and P. M. Atkinson. Biospytial: spatial graph-based com-  
679 puting for ecological Big Data. *GigaScience*, 9(5), may 2020. ISSN 2047217X. doi: 10.  
680 1093/gigascience/giaa039. URL [https://academic.oup.com/gigascience/article/doi/](https://academic.oup.com/gigascience/article/doi/10.1093/gigascience/giaa039/5835779)  
681 [10.1093/gigascience/giaa039/5835779](https://academic.oup.com/gigascience/article/doi/10.1093/gigascience/giaa039/5835779).
- 682 S. Ferrier, K. Ninan, P. Leadley, R. Alkemade, L. Acosta, H. Akcakaya, L. Brotons, W. Cheung,  
683 V. Christensen, K. Harhash, J. Kabubo-Mariara, C. Lundquist, M. Obersteiner, H. Pereira, G. Pe-  
684 terson, R. Pichs-Madruga, N. Ravindranath, C. Rondinini, and B. A. Wintle, editors. *IPBES: The*  
685 *methodological assessment report on Scenarios and Models of Biodiversity and Ecosystem Ser-*  
686 *vices*. ecretariat of the Intergovernmental Science-Policy Platform on Biodiversity and Ecosys-  
687 tem Services, Bonn, Germany, 2016. ISBN 978-92-807-3569-7.
- 688 S. Fick and R. Hijmans. Worldclim 2: New 1-km spatial resolution climate surfaces for global land  
689 areas. *International Journal of Climatology*, may 2017. ISSN 08998418. doi: 10.1002/joc.5086.  
690 URL <http://doi.wiley.com/10.1002/joc.5086>.
- 691 A. H. Fielding and J. F. Bell. A review of methods for the assessment of prediction errors in  
692 conservation presence/absence models. *Environmental Conservation*, 24(1):38–49, mar 1997.

- 693 ISSN 03768929. doi: 10.1017/S0376892997000088. URL [https://www.cambridge.org/core/  
694 product/identifier/S0376892997000088/type/journal\\_article](https://www.cambridge.org/core/product/identifier/S0376892997000088/type/journal_article).
- 695 W. B. Foden and B. E. Young. IUCN SSC Guidelines for Assessing Species' Vulnerability to Climate  
696 Change. Technical report, Cambridge, United Kingdom, 2016.
- 697 J. Franklin, J. M. Serra-Diaz, A. D. Syphard, and H. M. Regan. Big data for forecasting the impacts of  
698 global change on plant communities. *Global Ecology and Biogeography*, pages 6–17, 2016. ISSN  
699 14668238. doi: 10.1111/geb.12501.
- 700 J. Friedman. Greedy Function Approximation : A Gradient Boosting Machine Author ( s ): Jerome  
701 H . Friedman Source : The Annals of Statistics , Vol . 29 , No . 5 ( Oct . , 2001 ) , pp . 1189-1232 Pub-  
702 lished by : Institute of Mathematical Statistics Stable URL : [http://www. The Annals of Statistics](http://www.TheAnnalsofStatistics.com),  
703 29(5):1189–1232, 2001.
- 704 J. H. Friedman. Multivariate Adaptive Regression Splines. *The Annals of Statistics*, 19(1):1–67, 1991.
- 705 GBIF Secretariat. Global Biodiversity Infrastructure, 2015. URL [http://www.gbif.org/  
706 participation/participant-list](http://www.gbif.org/participation/participant-list).
- 707 GBIF Secretariat. GBIF Backbone Taxonomy, 2017. URL [ttps://doi.org/10.15468/  
708 39omeiaccessedviaGBIF.org](https://doi.org/10.15468/39omeiaccessedviaGBIF.org).
- 709 GBIF.org. GBIF Occurrence Download, 2016. URL [https://www.gbif.org/occurrence/  
710 download/0024366-151016162008034](https://www.gbif.org/occurrence/download/0024366-151016162008034).
- 711 GDAL/OGR Contributors. GDAL/OGR - Geospatial Data Abstraction software Library, 2018. URL  
712 <https://www.gdal.org/>.
- 713 A. E. Gelfand and S. Shirota. Preferential sampling for presence/absence data and for fusion of  
714 presence/absence data with presence-only data. *Ecological Monographs*, page e01372, may  
715 2019. ISSN 0012-9615. doi: 10.1002/ecm.1372. URL [https://onlinelibrary.wiley.com/  
716 doi/abs/10.1002/ecm.1372](https://onlinelibrary.wiley.com/doi/abs/10.1002/ecm.1372)<http://arxiv.org/abs/1809.01322>.
- 717 A. E. Gelfand and P. Vounatsou. Proper multivariate conditional autoregressive models for spatial  
718 data analysis. *Biostatistics*, 4(1):11–15, jan 2003. ISSN 14654644. doi: 10.1093/biostatistics/  
719 4.1.11. URL [https://academic.oup.com/biostatistics/article-lookup/doi/10.1093/  
720 biostatistics/4.1.11](https://academic.oup.com/biostatistics/article-lookup/doi/10.1093/biostatistics/4.1.11).
- 721 A. E. Gelfand, P. J. Diggle, M. Fuentes, and P. Guttorp. *Handbook of Spatial Statistics*, volume 53.  
722 2013. ISBN 9788578110796. doi: 10.1017/CBO9781107415324.004.
- 723 A. Gelman and C. R. Shalizi. Philosophy and the practice of Bayesian statistics. *British Journal  
724 of Mathematical and Statistical Psychology*, 66(1):8–38, 2013. ISSN 00071102. doi: 10.1111/j.  
725 2044-8317.2011.02037.x.

- 726 J. Geweke. Evaluating the Accuracy of Sampling-Based Approaches to the Calculation of Posterior  
727 Moments. *Bayesian Statistics*, 4:1–31, 1992.
- 728 N. Golding and B. V. Purse. Fast and flexible Bayesian species distribution modelling using Gaus-  
729 sian processes. *Methods in Ecology and Evolution*, 7(5):598–608, may 2016. ISSN 2041210X. doi:  
730 10.1111/2041-210X.12523. URL <http://doi.wiley.com/10.1111/2041-210X.12523>.
- 731 G. Guillera-Aroita, J. J. Lahoz-Monfort, and J. Elith. Maxent is not a presence-absence method:  
732 A comment on Thibaud et al. *Methods in Ecology and Evolution*, 5(11):1192–1197, 2014. ISSN  
733 2041210X. doi: 10.1111/2041-210X.12252.
- 734 A. Guisan and N. E. Zimmermann. Predictive habitat distribution models in ecology. *Ecological*  
735 *Modelling*, 135(2-3):147–186, dec 2000. ISSN 03043800. doi: 10.1016/S0304-3800(00)00354-9.  
736 URL <https://www.sciencedirect.com/science/article/pii/S0304380000003549>.
- 737 A. Guisan, T. C. Edwards, and T. Hastie. Generalized linear and generalized additive mod-  
738 els in studies of species distributions: Setting the scene. *Ecological Modelling*, 157  
739 (2-3):89–100, nov 2002. ISSN 03043800. doi: 10.1016/S0304-3800(02)00204-1. URL  
740 [https://www-sciencedirect-com.ezproxy.lancs.ac.uk/science/article/pii/](https://www-sciencedirect-com.ezproxy.lancs.ac.uk/science/article/pii/S0304380002002041)  
741 [S0304380002002041](https://www-sciencedirect-com.ezproxy.lancs.ac.uk/science/article/pii/S0304380002002041).
- 742 B. Haegeman and M. Loreau. Limitations of entropy maximization in ecology. *Oikos*, 2008. ISSN  
743 00301299. doi: 10.1111/j.1600-0706.2008.16539.x.
- 744 N. T. Hobbs and M. B. Hooten. *Bayesian models: A statistical primer for ecologists*. Princeton  
745 University Press, 2015. ISBN 9781400866557.
- 746 L. N. Hudson, T. Newbold, S. Contu, S. L. Hill, J. P. Scharlemann, and A. Purvis. The PREDICTS  
747 database: A global database of how local terrestrial biodiversity responds to human impacts.  
748 *Ecology and Evolution*, 4(24):4701–4735, 2014. ISSN 20457758. doi: 10.1002/ece3.1303.
- 749 J. B. Illian, S. Martino, S. H. Sørbye, J. B. Gallego-Fernández, M. Zunzunegui, M. P. Esquivias, and  
750 J. M. Travis. Fitting complex ecological point process models with integrated nested Laplace  
751 approximation. *Methods in Ecology and Evolution*, 4(4):305–315, 2013. ISSN 2041210X. doi:  
752 10.1111/2041-210x.12017.
- 753 INEGI. Conjunto de datos vectoriales de la carta de uso Uso del suelo y vegetación, es-  
754 cala 1:250000, serie V (continuo nacional), 2015. URL [http://www.inegi.org.mx/geo/](http://www.inegi.org.mx/geo/contenidos/reccat/edafologia/vectorial_serieii.aspx)  
755 [contenidos/reccat/edafologia/vectorial\\_serieii.aspx](http://www.inegi.org.mx/geo/contenidos/reccat/edafologia/vectorial_serieii.aspx).
- 756 Instituto Mexicano del Transporte and Gobierno de Mexico. Red Nacional de Caminos, 2014. URL  
757 <https://www.gob.mx/imt/acciones-y-programas/red-nacional-de-caminos>.

- 758 Intergovernmental Panel on Climate Change. Climate Change 2014: Impacts, Adaptation and Vul-  
759 nerability. Summary for Policy Makers. *Climate Change 2014: Impacts, Adaptation and Vulner-*  
760 *ability - Contributions of the Working Group II to the Fifth Assessment Report*, pages 1–32, 2014.  
761 ISSN 09601481. doi: 10.1016/j.renene.2009.11.012. URL <https://www.ipcc.ch>.
- 762 N. J. Isaac and M. J. Pocock. Bias and information in biological records. *Biological Journal of the*  
763 *Linnean Society*, 115(3):522–531, 2015. ISSN 10958312. doi: 10.1111/bij.12532.
- 764 A. Jiménez-Valverde. Insights into the area under the receiver operating characteristic curve (AUC)  
765 as a discrimination measure in species distribution modelling. *Global Ecology and Biogeog-*  
766 *raphy*, 21(4):498–507, apr 2012. ISSN 1466822X. doi: 10.1111/j.1466-8238.2011.00683.x. URL  
767 <http://doi.wiley.com/10.1111/j.1466-8238.2011.00683.x>.
- 768 A. Jiménez-Valverde, J. M. Lobo, and J. Hortal. Not as good as they seem: the importance of  
769 concepts in species distribution modelling. *Diversity and Distributions*, 14(6):885–890, nov  
770 2008. ISSN 13669516. doi: 10.1111/j.1472-4642.2008.00496.x. URL [http://doi.wiley.com/](http://doi.wiley.com/10.1111/j.1472-4642.2008.00496.x)  
771 [10.1111/j.1472-4642.2008.00496.x](http://doi.wiley.com/10.1111/j.1472-4642.2008.00496.x).
- 772 A. Jiménez-Valverde, A. T. Peterson, J. Soberón, J. M. Overton, P. Aragón, and J. M. Lobo. Use of  
773 niche models in invasive species risk assessments. *Biological Invasions*, 13(12):2785–2797, 2011.  
774 ISSN 13873547. doi: 10.1007/s10530-011-9963-4.
- 775 L. Kavanagh, D. Lee, and G. Pryce. Is Poverty Decentralizing? Quantifying Uncertainty in the  
776 Decentralization of Urban Poverty. *Annals of the American Association of Geographers*, 106  
777 (6):1286–1298, nov 2016. ISSN 24694460. doi: 10.1080/24694452.2016.1213156. URL <https://www.tandfonline.com/doi/full/10.1080/24694452.2016.1213156>.
- 778
- 779 K. A. Keating and S. Cherry. Use and Interpretation of logistic regression in  
780 habitat-selection studies. *Journal of Wildlife Management*, 68(4):774–789, oct  
781 2004. ISSN 0022-541X. doi: 10.2193/0022-541x(2004)068[0774:uaiolr]2.0.co;  
782 2. URL [https://bioone.org/journals/journal-of-wildlife-management/](https://bioone.org/journals/journal-of-wildlife-management/volume-68/issue-4/0022-541X(2004)068%5B0774%3AUAIOLR%5D2.0.CO%3B2/USE-AND-INTERPRETATION-OF-LOGISTIC-REGRESSION-IN-HABITAT-SELECTION-STUDIES/10.2193/0022-541X(2004)068[0774:UAIOLR]2.0.CO;2.short)  
783 [volume-68/issue-4/0022-541X\(2004\)068%5B0774%3AUAIOLR%5D2.0.CO%3B2/](https://bioone.org/journals/journal-of-wildlife-management/volume-68/issue-4/0022-541X(2004)068%5B0774%3AUAIOLR%5D2.0.CO%3B2/USE-AND-INTERPRETATION-OF-LOGISTIC-REGRESSION-IN-HABITAT-SELECTION-STUDIES/10.2193/0022-541X(2004)068[0774:UAIOLR]2.0.CO;2.short)  
784 [USE-AND-INTERPRETATION-OF-LOGISTIC-REGRESSION-IN-HABITAT-SELECTION-STUDIES/](https://bioone.org/journals/journal-of-wildlife-management/volume-68/issue-4/0022-541X(2004)068%5B0774%3AUAIOLR%5D2.0.CO%3B2/USE-AND-INTERPRETATION-OF-LOGISTIC-REGRESSION-IN-HABITAT-SELECTION-STUDIES/10.2193/0022-541X(2004)068[0774:UAIOLR]2.0.CO;2.short)  
785 [10.2193/0022-541X\(2004\)068\[0774:UAIOLR\]2.0.CO;2.short](https://bioone.org/journals/journal-of-wildlife-management/volume-68/issue-4/0022-541X(2004)068%5B0774%3AUAIOLR%5D2.0.CO%3B2/USE-AND-INTERPRETATION-OF-LOGISTIC-REGRESSION-IN-HABITAT-SELECTION-STUDIES/10.2193/0022-541X(2004)068[0774:UAIOLR]2.0.CO;2.short).
- 786 D. Lee. CARBayes : An R Package for Bayesian Spatial Modeling with Conditional Autoregressive  
787 Priors. *Journal of Statistical Software*, 55(13):1–24, nov 2013. ISSN 1548-7660. doi: 10.18637/jss.  
788 v055.i13. URL <http://www.jstatsoft.org/v55/i13/>.
- 789 N. P. Lemoine. Moving beyond noninformative priors: why and how to choose weakly informative  
790 priors in Bayesian analyses. *Oikos*, 128(7):912–928, 2019. ISSN 16000706. doi: 10.1111/oik.  
791 05985.

- 792 B. G. Leroux, X. Lei, and N. Breslow. Estimation of Disease Rates in Small Areas: A new Mixed  
793 Model for Spatial Dependence. pages 179–191. 2000. doi: 10.1007/978-1-4612-1284-3\_4. URL  
794 [http://link.springer.com/10.1007/978-1-4612-1284-3\\_4](http://link.springer.com/10.1007/978-1-4612-1284-3_4).
- 795 C. Merow, M. J. Smith, and J. A. Silander. A practical guide to MaxEnt for modeling species' distri-  
796 butions: What it does, and why inputs and settings matter. *Ecography*, 36(10):1058–1069, 2013.  
797 ISSN 09067590. doi: 10.1111/j.1600-0587.2013.07872.x.
- 798 J. Møller, A. R. Syversveen, and R. P. Waagepetersen. Log Gaussian Cox processes. *Scandinavian*  
799 *Journal of Statistics*, 25(3):451–482, 1998. ISSN 03036898. doi: 10.1111/1467-9469.00115.
- 800 S. Monsarrat, A. F. Boshoff, and G. I. H. Kerley. Accessibility maps as a tool to predict sampling  
801 bias in historical biodiversity occurrence records. *Ecography*, aug 2018. ISSN 09067590. doi:  
802 10.1111/ecog.03944. URL <http://doi.wiley.com/10.1111/ecog.03944>.
- 803 B. Naimi and M. B. Araújo. Sdm: A reproducible and extensible R platform for species distribution  
804 modelling. *Ecography*, 39(4):368–375, apr 2016. ISSN 16000587. doi: 10.1111/ecog.01881. URL  
805 <http://doi.wiley.com/10.1111/ecog.01881>.
- 806 L. M. Navarro, N. Fernández, C. Guerra, R. Guralnick, W. D. Kissling, M. C. Londoño, F. Muller-  
807 Karger, E. Turak, P. Balvanera, M. J. Costello, A. Delavaud, G. Y. El Serafy, S. Ferrier, I. Geijzendorf-  
808 fer, G. N. Geller, W. Jetz, E. S. Kim, H. J. Kim, C. S. Martin, M. A. McGeoch, T. H. Mwampamba, J. L.  
809 Nel, E. Nicholson, N. Pettorelli, M. E. Schaepman, A. Skidmore, I. Sousa Pinto, S. Vergara, P. Vi-  
810 hervara, H. Xu, T. Yahara, M. Gill, and H. M. Pereira. Monitoring biodiversity change through  
811 effective global coordination. *Current Opinion in Environmental Sustainability*, 29:158–169,  
812 2017. ISSN 18773435. doi: 10.1016/j.cosust.2018.02.005.
- 813 K. Pacifici, B. J. Reich, D. A. Miller, B. Gardner, G. Stauffer, S. Singh, A. McKerrow, and J. A. Collazo.  
814 Integrating multiple data sources in species distribution modeling: A framework for data fusion.  
815 *Ecology*, 98(3):840–850, mar 2017. ISSN 00129658. doi: 10.1002/ecy.1710. URL <http://doi.wiley.com/10.1002/ecy.1710>.
- 817 H. M. Pereira, P. W. Leadley, V. Proença, R. Alkemade, J. P. Scharlemann, J. F. Fernandez-Manjarrés,  
818 M. B. Araújo, P. Balvanera, R. Biggs, W. W. Cheung, L. Chini, H. D. Cooper, E. L. Gilman,  
819 S. Guénette, G. C. Hurtt, H. P. Huntington, G. M. Mace, T. Oberdorff, C. Revenga, P. Rodrigues,  
820 R. J. Scholes, U. R. Sumaila, and M. Walpole. Scenarios for global biodiversity in the 21st century.  
821 *Science*, 330(6010):1496–1501, 2010. ISSN 10959203. doi: 10.1126/science.1196624.
- 822 A. T. Peterson, J. Soberón, R. G. Pearson, R. P. Anderson, E. Martínez-Meyer, M. Nakamura, and  
823 M. B. Araújo. *Ecological Niches and Geographic Distributions (MPB-49)*. Princeton Univer-  
824 sity Press, nov 2011. ISBN 9780691136868. doi: 10.23943/princeton/9780691136868.001.0001.  
825 URL [http://princeton.universitypressscholarship.com/view/10.23943/princeton/  
826 9780691136868.001.0001/ups0-9780691136868](http://princeton.universitypressscholarship.com/view/10.23943/princeton/9780691136868.001.0001/ups0-9780691136868).

- 827 S. J. Phillips, R. P. Anderson, and R. E. Schapire. Maximum entropy modeling of species geographic  
828 distributions. *Ecological Modelling*, 190(3-4):231–259, jan 2006. ISSN 0304-3800. doi: 10.1016/J.  
829 ECOLMODEL.2005.03.026. URL [https://www.sciencedirect.com/science/article/pii/  
830 S030438000500267X?via%3Dihub](https://www.sciencedirect.com/science/article/pii/S030438000500267X?via%3Dihub).
- 831 S. J. Phillips, M. Dudík, J. Elith, C. H. Graham, A. Lehmann, J. Leathwick, and S. Ferrier. Sam-  
832 ple selection bias and presence-only distribution models: implications for background and  
833 pseudo-absence data. *Ecological Applications*, 19(1):181–197, jan 2009. ISSN 1051-0761. doi:  
834 10.1890/07-2153.1. URL <http://doi.wiley.com/10.1890/07-2153.1>.
- 835 S. J. Phillips, R. P. Anderson, M. Dudík, R. E. Schapire, and M. E. Blair. Opening the black box:  
836 an open-source release of Maxent. *Ecography*, 40(7):887–893, jul 2017. ISSN 16000587. doi:  
837 10.1111/ecog.03049. URL <http://doi.wiley.com/10.1111/ecog.03049>.
- 838 M. Plummer, N. Best, K. Cowles, and K. Vines. CODA: Convergence Diagnosis and Output Analysis  
839 for MCMC. *R News*, 6(1):7 – 11, 2006. URL <https://journal.r-project.org/archive/>.
- 840 I. W. Renner, J. Elith, A. Baddeley, W. Fithian, T. Hastie, S. J. Phillips, G. Popovic, and D. I. Warton.  
841 Point process models for presence-only analysis. *Methods in Ecology and Evolution*, 6(4):  
842 366–379, 2015. ISSN 2041210X. doi: 10.1111/2041-210X.12352.
- 843 I. W. Renner, J. Louvrier, and O. Gimenez. Combining multiple data sources in species distribu-  
844 tion models while accounting for spatial dependence and overfitting with combined penalised  
845 likelihood maximisation. *Methods in Ecology and Evolution*, pages 2041–210X.13297, sep 2019.  
846 ISSN 2041-210X. doi: 10.1111/2041-210X.13297. URL [https://onlinelibrary.wiley.com/  
847 doi/abs/10.1111/2041-210X.13297](https://onlinelibrary.wiley.com/doi/abs/10.1111/2041-210X.13297).
- 848 G. O. Roberts and R. L. Tweedie. Exponential Convergence of Langevin Distributions and Their  
849 Discrete Approximations. *Bernoulli*, 2(4):341, dec 2006. ISSN 13507265. doi: 10.2307/3318418.  
850 URL <https://www.jstor.org/stable/3318418?origin=crossref>.
- 851 F. Rosenblatt. The perceptron: A probabilistic model for information storage and organization in  
852 the brain. *Psychological Review*, 1958. ISSN 0033295X. doi: 10.1037/h0042519.
- 853 J. A. Royle and M. Kéry. A BAYESIAN STATE-SPACE FORMULATION OF DYNAMIC OCCUPANCY  
854 MODELS. *Ecology*, 88(7):1813–1823, jul 2007. ISSN 0012-9658. doi: 10.1890/06-0669.1. URL  
855 <http://doi.wiley.com/10.1890/06-0669.1>.
- 856 H. Rue and L. Held. *Gaussian markov random fields: Theory and applications*. Chapman  
857 and Hall/CRC, 2005. ISBN 9780203492024. doi: 10.1198/tech.2006.s352. URL [https:  
858 //www.crcpress.com/Gaussian-Markov-Random-Fields-Theory-and-Applications/  
859 Rue-Held/p/book/9781584884323](https://www.crcpress.com/Gaussian-Markov-Random-Fields-Theory-and-Applications/Rue-Held/p/book/9781584884323).

- 860 J. Rzedowski. *Vegetación de México*. Comisión Nacional para el Conocimiento y Uso de la Biodiver-  
861 sidad, Mexico, 1ra. edición, 2006. ISBN 9681800028. URL [https://www.biodiversidad.gob.mx/publicaciones/librosDig/pdf/VegetacionMx\\_Cont.pdf](https://www.biodiversidad.gob.mx/publicaciones/librosDig/pdf/VegetacionMx_Cont.pdf).  
862
- 863 P. Segurado and M. B. Araújo. An evaluation of methods for modelling species distributions. *Jour-*  
864 *nal of Biogeography*, 31(10):1555–1568, 2004. ISSN 03050270. doi: 10.1111/j.1365-2699.2004.  
865 01076.x.
- 866 W. Smith. Forest inventory and analysis: a national inventory and monitoring program. *En-*  
867 *vironmental Pollution*, 116(SUPPL. 1):S233–S242, mar 2002. ISSN 02697491. doi: 10.  
868 1016/S0269-7491(01)00255-X. URL <https://linkinghub.elsevier.com/retrieve/pii/S026974910100255X>.  
869
- 870 J. Soberón. Grinnellian and Eltonian niches and geographic distributions of species. *Ecology Let-*  
871 *ters*, 10(12):1115–1123, dec 2007. ISSN 1461-023X. doi: 10.1111/j.1461-0248.2007.01107.x. URL  
872 <http://doi.wiley.com/10.1111/j.1461-0248.2007.01107.x>.
- 873 J. Soberon and M. Nakamura. Niches and distributional areas: Concepts, methods, and assump-  
874 tions. *Proceedings of the National Academy of Sciences*, 106(Supplement 2):19644–19650, nov  
875 2009. ISSN 0027-8424. doi: 10.1073/pnas.0901637106. URL [http://www.pnas.org/cgi/doi/](http://www.pnas.org/cgi/doi/10.1073/pnas.0901637106)  
876 [10.1073/pnas.0901637106](http://www.pnas.org/cgi/doi/10.1073/pnas.0901637106).
- 877 A. Sorichetta, G. M. Hornby, F. R. Stevens, A. E. Gaughan, C. Linard, and A. J. Tatem. High-  
878 resolution gridded population datasets for Latin America and the Caribbean in 2010, 2015, and  
879 2020. *Scientific Data*, 2(1):150045, dec 2015. ISSN 2052-4463. doi: 10.1038/sdata.2015.45. URL  
880 <http://www.nature.com/articles/sdata201545>.
- 881 D. J. Spiegelhalter, N. G. Best, B. P. Carlin, and A. Van Der Linde. Bayesian measures of model  
882 complexity and fit. *Journal of the Royal Statistical Society. Series B: Statistical Methodology*, 64  
883 (4):583–616, oct 2002. ISSN 13697412. doi: 10.1111/1467-9868.00353. URL <http://doi.wiley.com/10.1111/1467-9868.00353>.  
884
- 885 B. L. Sullivan, C. L. Wood, M. J. Iliff, R. E. Bonney, D. Fink, and S. Kelling. eBird: A citizen-based bird  
886 observation network in the biological sciences. *Biological Conservation*, 2009. ISSN 00063207.  
887 doi: 10.1016/j.biocon.2009.05.006.
- 888 M. A. Tanner and W. H. Wong. The calculation of posterior distributions by data augmentation.  
889 *Journal of the American Statistical Association*, 82(398):528–540, jun 1987. ISSN 1537274X. doi:  
890 10.1080/01621459.1987.10478458. URL [https://www.jstor.org/stable/2289457?origin=](https://www.jstor.org/stable/2289457?origin=crossref)  
891 [crossref](https://www.jstor.org/stable/2289457?origin=crossref).
- 892 N. Turck, L. Vutskits, P. Sanchez-Pena, X. Robin, A. Hainard, M. Gex-Fabry, C. Fouda, H. Bassem,  
893 M. Mueller, F. Lisacek, L. Puybasset, and J.-C. Sanchez. pROC: an open-source package for R and

- 894 S+ to analyze and compare ROC curves. *BMC Bioinformatics*, 8:12–77, 2011. ISSN 0342-4642.  
895 URL <http://link.springer.com/10.1007/s00134-009-1641-y>.
- 896 A. T. Vázquez. Portal de Información Geográfica - CONABIO. nov 2018. URL <http://www.conabio.gob.mx/informacion/gis/>.
- 898 E. Velázquez, I. Martínez, S. Getzin, K. A. Moloney, and T. Wiegand. An evaluation of the state of  
899 spatial point pattern analysis in ecology. *Ecography*, 39(11):1042–1055, 2016. ISSN 16000587.  
900 doi: 10.1111/ecog.01579.
- 901 G. Ward, T. Hastie, S. Barry, J. Elith, and J. R. Leathwick. Presence-Only Data and the EM Algorithm.  
902 *Biometrics*, 65(2):554–563, jun 2009. ISSN 0006341X. doi: 10.1111/j.1541-0420.2008.01116.x.  
903 URL <http://doi.wiley.com/10.1111/j.1541-0420.2008.01116.x>.
- 904 J. A. Wiens, D. Stralberg, D. Jongsomjit, C. A. Howell, and M. A. Snyder. Niches, models, and climate  
905 change: Assessing the assumptions and uncertainties. *Proceedings of the National Academy of  
906 Sciences of the United States of America*, 106(SUPPL. 2):19729–19736, 2009. ISSN 10916490. doi:  
907 10.1073/pnas.0901639106.

## 908 **9. Biosketch**

909 Juan Escamilla Mólgora is interested in developing computational and statistical methodologies  
910 for studying spatial patterns of life at different scales. This work was part of his PhD research at  
911 Lancaster University on the development of a computational and statistical framework for mod-  
912 elling species distributions using presence-only data from different sources. The co-authors col-  
913 laborate in developing spatial statistical methods applied to epidemiological and environmental  
914 problems.

### 915 *9.1. Authors' contributions*

916 All authors developed the general framework and provided critical feedback in all the stages of this  
917 work. More specifically, PD proposed the three model specifications. PA proposed the choosing  
918 principle. LS and JEM designed the modelling and simulations strategies. JEM prepared the data,  
919 implemented the models, performed the analysis and visualizations and wrote the manuscript  
920 with inputs and edits from all co-authors. PA, LS and PD supervised the project.



## 921 **Appendix A. Supplementary materials I: Framework specification**

922 We begin by defining a grid inside a region of interest located somewhere on the Earth's surface.  
 923 Mathematically this is a spatial lattice  $\mathbb{W} = \{k_1, \dots, k_K\}$  that partitions a compact set  $A \subset \mathbb{S}^2 \subset \mathbb{R}^3$  into  
 924  $K$  non-overlapping compact subregions. Let  $X = \{x_k | k \in \mathbb{W}\}$  be the recorded presence of a certain  
 925 sample (or survey) and  $Y = \{y_k | k \in \mathbb{W}\}$  the presence of a taxon (e.g. species) of interest (ToI). As  
 926 such,  $x_k$  and  $y_k$  are two binary random variables corresponding to the events of: *a sample  $x_k$  has*  
 927 *been registered in location  $k$  and taxon  $y_k$  is present at location  $k$ .* Missing observations are defined  
 928 in the same lattice as:  $\tilde{X} = \{\tilde{x}_k | k \in \mathbb{W} \wedge \mathcal{R}_x(k)\}$  where  $\mathcal{R}_x(k)$  is the predicate of: *there is no recorded*  
 929 *evidence of  $x$  in  $k$  and similarly,  $\tilde{Y} = \{\tilde{y}_k | k \in \mathbb{W} \wedge \mathcal{R}_y(k)\}$  where  $\mathcal{R}_y(k)$  is the predicate of: *there is*  
 930 *no recorded evidence of the presence of  $y$  in  $k$ .* The data augmentation methodology (Tanner and  
 931 Wong, 1987) implemented in CARBayes (Lee, 2013) generates posterior samples of  $\tilde{X}$  and  $\tilde{Y}$ . We  
 932 opted to omit any further specification for the variables  $\tilde{X}$  and  $\tilde{Y}$  here, to simplify the description  
 933 of the framework.*

934 The general specification of the framework factorises the joint probability distribution in the fol-  
 935 lowing form:

$$[Y, X, P_Y, P_X, R_Y, R_X, \beta_Y, \beta_X; d_Y, d_X, \mathbb{W}] = [Y|P_Y][X|P_X] \quad (\text{A.1})$$

$$[P_Y|R_Y, \beta_Y][P_X|R_X, \beta_X] \quad (\text{A.2})$$

$$[\beta_Y; d_Y][\beta_X; d_X] \quad (\text{A.3})$$

$$[R_Y, R_X; \mathbb{W}] \quad (\text{A.4})$$

Equations 1 to 3 are consistent across the framework while the specification for equation 4 (i.e. *random effects*) vary according to three different assumptions of spatial autocorrelation; independent components (model I), a common spatial component (model II) and correlated spatial components (model III). We start by defining equations 1 and 2. That is, the probability of presence for a ToI ( $Y_k$ ) given the latent variable  $P_Y(k)$  in a cell  $k$  and similarly, the probability of a sample  $X_k$  to be present given its respective latent variable  $P_X(k)$ . These binary random variables are modelled as following:

$$[Y|P_Y = p_y] \sim \text{Bernoulli}(p_y) \quad (\text{A.5})$$

$$[X|P_X = p_x] \sim \text{Bernoulli}(p_x) \quad (\text{A.6})$$

### 936 *Appendix A.1. Latent variables $P_Y$ and $P_X$*

937 We assume that the presence-only data represent realizations of a joint stochastic process separa-  
 938 rable in two components: one relative to an ecological process  $P_Y$  that drives the environmental  
 939 suitability for the ToI, and another process  $P_X$  related to the sampling effort. We, therefore, model  
 940  $[P_Y = p_y | R_Y = r_y, \beta_Y; d_Y]$  and  $[P_X = p_x | R_X = r_x, \beta_X; d_X]$  (eqs. A.2) according to the following spec-

941 ification:

$$\log\left(\frac{p_y}{1-p_y}\right) = d_Y^t \beta_Y + r_y \quad (\text{A.7})$$

$$\log\left(\frac{p_x}{1-p_x}\right) = d_X^t \beta_X + r_x \quad (\text{A.8})$$

942 where  $d_X$  and  $d_Y$  represent vectors of explanatory variables and  $r_X$  and  $r_Y$  the random effects for  
943  $X$  and  $Y$  respectively. Specifically,  $d_Y$  is suited for environmental variables of ecological impor-  
944 tance, while  $d_X$  should account for variables that help explain the sampling process. The prior  
945 distributions for  $\beta_Y$  and  $\beta_X$  (eq: A.3) are defined, as default, as uninformative zero-mean normal  
946 distributions with default variance 100,000. We acknowledge that the use of uninformative pri-  
947 ors can yield to skewed parameter estimates and negate the advantage of using Bayesian methods  
948 over frequentist analyses (Hobbs and Hooten, 2015; Gelman and Shalizi, 2013). These hyperpa-  
949 rameter values are default options in CarBayes (Lee, 2013) and, consequently, in our modelling  
950 framework. As such, they can be changed according to the user needs. See (Lemoine, 2019) for  
951 a concise guide on using informative and weakly informative priors in ecological models. In the  
952 following section we present the three alternatives for modelling  $R_X$  and  $R_Y$ .

### 953 *Appendix A.2. Random effects*

954 The general form of the random effects component for  $P_Y$  (and  $P_X$ ) is defined as an independent  
955 zero-mean random variable  $R_Y$  ( $R_X$ ). This variable accounts for the combined effect of a spatial  
956 process  $S_Y$  ( $S_X$ ) that models the spatial variation across the lattice  $\mathbb{W}$  and an independent normally  
957 distributed random variable  $Z_Y$  ( $Z_X$ ) with variance  $\sigma_Y^2$  ( $\sigma_X^2$ ) that accounts for unstructured noise  
958 inside each cell of the lattice.

959 Specifically, these random effects are defined as follows:

$$\begin{aligned} [2] R_Y &= S_Y + Z_Y \\ R_X &= S_X + Z_X \end{aligned} \quad (\text{A.9})$$

960 where  $Z_Y \sim N(0, \sigma_Y)$  and  $Z_X \sim N(0, \sigma_X)$  and the spatial components  $S_Y$  and  $S_X$  are modelled as  
961 *intrinsic conditional autoregressions* (ICAR) (Besag, 1974; Besag et al., 1991) with parameters  $\tau_Y^2$   
962 and  $\tau_X^2$  respectively, over the lattice  $\mathbb{W}$ . In the rest of this work we represent  $\mathbb{W}$  in its matrix form,  
963 that is, the adjacency matrix  $W$  of its graph representation; defined as a  $k \times k$  symmetric matrix  
964 with entries:  $w_{i,j} = 1 = w_{j,i}$  if cells  $i$  and  $j$  are neighbours, otherwise  $w_{i,j} = 0$ . Modelling the spatial  
965 autocorrelation as an ICAR eases significantly the computation of  $W^{-1}$  with the aid of optimised  
966 methods for sparse matrix algebra (Rue and Held, 2005). This approach simplifies significantly the  
967 inference, prediction and posterior sampling, a great advantage in applications with large datasets.

968 *Appendix A.3. Three models for spatial autocorrelation*

969 The proposed framework assumes that the ecological process  $P_Y$  and the anthropogenic sampling  
 970 process  $P_X$  are independent when conditioned to the random effects  $R_Y$  and  $R_X$  (see figure 1 and  
 971 eq: A.2). This assumption implies that the only source of dependency between  $R_Y$  and  $R_X$  is the  
 972 dependency between the spatial effects  $S_Y$  and  $S_X$ , this by the assumption of independence be-  
 973 tween variables  $Z_Y$  and  $Z_X$ . Moreover, the framework assumes that the observations of presence  
 974 for the ToI and the existence of the survey (sampling) are independent when conditioned to the  
 975 spatial effect. As such, the spatial autocorrelation structure is the component responsible for in-  
 976 forming both processes. In order to test for this we designed three possible models in which the  
 977 spatial processes  $S_Y$  and  $S_X$  inform  $R_Y$  and  $R_X$ . Model I in which the spatial components  $S_Y$  and  
 978  $S_X$  are independent, Model II with a unique spatial component shared between both processes  
 979  $P_X$  and  $P_Y$  (i.e.  $S_X = S_Y$ ) and Model III in which the spatial components  $S_X$  and  $S_Y$  are correlated.  
 980 Below we give the full description of each model.

981 *Appendix A.3.1. Model I: Independent Spatial Components (ISC)*

This model assumes that the spatial random effects on both processes ( $R_X, R_Y$ ) are independent.  
 By equations A.9 the joint distribution is given by

$$[R_Y, R_X; \mathbb{W}] = [S_Y, S_X, Z_X, Z_Y, \tau_Y^2, \tau_X^2, \sigma_Y^2, \sigma_X^2; W]$$

982 and, given the assumptions on independence, it can be factorised into:

$$[S_Y, S_X, Z_X, Z_Y, \tau_Y^2, \tau_X^2, \sigma_Y^2, \sigma_X^2; W] = [S_Y | \tau_Y^2; W][S_X | \tau_X^2; W] \quad (\text{A.10})$$

$$[Z_X | \sigma_X][Z_X, \sigma_X^2] \quad (\text{A.11})$$

$$[\tau_Y^2][\tau_X^2][\sigma_Y^2][\sigma_X^2] \quad (\text{A.12})$$

983 where the term  $[S_l | \tau_l^2; W]$  ( $l$  being  $X$  or  $Y$ ) is modelled as an ICAR (Besag, 1974; Besag et al., 1991)  
 984 with a full conditional form of:

$$[S_{l_k} | S_{l_{-k}}, \tau_l^2; W] \sim N \left( \frac{\sum_{i=1}^K w_{k,i} S_{l_i}}{\sum_{i=1}^K w_{k,i}}, \frac{\tau_l^2}{\sum_{i=1}^K w_{k,i}} \right) \quad (\text{A.13})$$

985 for each process  $l \in \{Y, X\}$  on each cell  $k$  (i.e.  $S_{l_k}$ ). The prior distributions for parameters  $\tau_l^2$  and  
 986  $\sigma_l^2$  are defined as inverse gamma(1,0.01), default values in the package *CARBayes*. Figure 1a (in the  
 987 main text) shows a general DAG structure for this model.

988 *Appendix A.3.2. Model II: Common Spatial Component (CSC)*

989 This model assumes that the random effects  $R_X$  and  $R_Y$  share the same spatial component  $S$  (i.e.  
 990  $S_X = S_Y$ ). By equations A.9 the joint distribution is given by  $[R_Y, R_X; W] = [S, Z_Y, Z_X, \tau^2, \sigma_Y^2, \sigma_X^2; W]$

991 and, given the assumptions on independence, it can be factorised as:

$$[S, Z_Y, Z_X, \tau^2, \sigma_Y^2, \sigma_X^2; W] = [S|\tau^2; W] \quad (\text{A.14})$$

$$[Z_Y|\sigma_Y^2][Z_X|\sigma_X^2] \quad (\text{A.15})$$

$$[\sigma_Y^2][\sigma_X^2] \quad (\text{A.16})$$

992 Similarly to model I, the spatial effect  $[S|\tau^2; W]$  is modelled as an ICAR (Besag, 1974; Besag et al.,  
993 1991) in full conditional form on each cell  $k \in \mathbb{W}$ .

$$[S_k|S_{-k}, \tau^2; W] \sim N\left(\frac{\sum_{i=1}^K w_{k,i} S_i}{\sum_{i=1}^K w_{k,i}}, \frac{\tau^2}{\sum_{i=1}^K w_{k,i}}\right) \quad (\text{A.17})$$

994 The prior distributions for parameters  $\tau_l^2$  and  $\sigma_l^2$  are defined as inverse gamma(1,0.01), default  
995 values in the package *CARBayes*. Figure 1b (in the main text) shows a general DAG structure for  
996 this model. Model II is specified as a two-level model where each areal unit  $k$  has two response  
997 variables,  $X_k$  and  $Y_k$ . The individual level variation is split into two groups:  $Z_X$  and  $Z_Y$ . Figure 1b  
998 shows the DAG describing the model.

### 999 *Appendix A.3.3. Model III: Correlated Spatial Components (CSC)*

1000 This model specifies the joint random effect  $[R_Y, R_X; W]$  as a combined effect of the spatial pro-  
1001 cesses,  $S_Y$  and  $S_X$ . To model this effect, both spatial effects are ensembled as a bivariate condi-  
1002 tional autoregressive (BCAR) process that accounts for both  $S_Y$  and  $S_X$  simultaneously. To improve  
1003 the identifiability of the model, the unstructured random effect (i.e.  $Z_X$  and  $Z_Y$  in models I and II)  
1004 is integrated into the spatial effect using a more relaxed specification of the spatial autocorrelation  
1005 structure. This specification, proposed by Leroux et al. (2000), adds a new parameter  $\rho$  that mod-  
1006 els the strength of the spatial dependency. When  $\rho = 1$  the spatial dependency is maximum and  
1007 the spatial process is equivalent to an intrinsic CAR model. On the other hand, if  $\rho = 0$  there is no  
1008 evidence of spatial autocorrelation and therefore, the observations are spatially independent. To  
1009 make the comparison between models I and II consistent, we have restricted  $\rho = 1$ . However, this  
1010 restriction can be removed according to the needs of the users. Following the equations A.9 and  
1011 the DAG specification shown in figure 1c (in the main text) the joint distribution  $[R_Y, R_X; W]$  can  
1012 be factorised as:

$$[R_Y, R_X; W] = [S_{YX}|\Sigma, \rho; W][\Sigma][\rho] \quad (\text{A.18})$$

1013 The combined random effect  $S_{YX}$  is defined as the Kronecker product between the Leroux et al.  
1014 (2000) CAR model and a  $2 \times 2$  covariance matrix  $\Sigma$  that accounts for the cross variable effect be-  
1015 tween both processes. The correlation between both variables can be calculated as:

$$\text{Corr}(X, Y) = \frac{\Sigma_{1,2}}{\Sigma_{1,1}\Sigma_{2,2}} \quad (\text{A.19})$$

1016 The BCAR model is a particular case of the multivariate model (MCAR) proposed by Gelfand and  
1017 Vounatsou (2003) and it has been implemented in the R package CARBayes (Lee, 2013) following  
1018 the proposal of Kavanagh et al. (2016).  $S_{YX}$  is a realization of the following multivariate normal  
1019 distribution:

$$S_{YX} \sim N\left(0, [Q(W, \rho) \otimes \Sigma^{-1}]^{-1}\right) \quad (\text{A.20})$$

1020 The autocorrelation function  $Q(W, \rho)$  is defined by the precision matrix:

$$Q(W, \rho) = \rho[D - W] + (1 - \rho)I \quad (\text{A.21})$$

1021 where  $D$  is a  $k \times k$  diagonal matrix in which each entry  $d_{i,i}$  is equal to the number of neighbours  
1022 of each unit area  $i \in \{1, \dots, k\}$ . The prior for  $\Sigma$  is distributed as Inverse-Wishart(3,  $\Omega$ ) with three  
1023 degrees of freedom and  $\Omega = I_{2 \times 2}$  as scale matrix. The prior  $[\rho]$  is a non-informative uniform (0,1)  
1024 distribution. The DAG describing the model is described in figure 1c.

1025 **Appendix B. Supplementary materials II**

1026 This section contains the summary statistics of the fitted posterior distributions of the param-  
 1027 eters corresponding to models I, II and III, described in summary in the main text (section: 2) and  
 1028 extensively in the supplementary materials Appendix A. The summary statistics corresponding to  
 1029 the presence of pines (using plants as sampling effort) is showed first. The second case study is  
 1030 showed in the next section. The structure of every table is the same for all models in both exam-  
 1031 ples. The rows describe the parameters corresponding to each model (on each table). The first  
 1032 three columns describe the median, upper and lower bounds of the 95% credible intervals. The  
 1033 n.effective column indicates an estimate for the size of independent samples (taking into ac-  
 1034 count autocorrelations within each chain of the MCMC sampler). The column % accepted refers  
 1035 to the proportion of times a proposed value was accepted by the Metropolis updating step as a  
 1036 new value of the posterior sample (see (Lee, 2013)). The column Geweke.diag refers to Geweke's  
 1037 convergence diagnostic (Geweke, 1992) which compares the means calculated from distinct parts  
 1038 of the Markov chain to test for convergence of the stationary distribution (default first 10% and last  
 1039 50%). If the chains reached a stationary distribution, then the two means are equal and Geweke's  
 1040 statistic has an asymptotically standard normal distribution. All models can be fitted in CARBayes  
 1041 (Lee, 2013), which uses the R package Coda (Plummer et al., 2006) for calculating n.effective  
 1042 and Geweke.diag.

1043 *Appendix B.1. Estimates for the predicted presence of Pines using botanical records as sample*

Table B.1: Posterior summaries of all the parameters in Model I with the associated 95% credible intervals for the example of pines. Parameters  $\tau_Y^2$  and  $\tau_X^2$  correspond to the variance of the spatial effects of the presence (Y) and the sample process (X) (i.e.  $S_Y$  and  $S_X$ ) respectively. Likewise,  $\sigma_Y^2$  and  $\sigma_X^2$  correspond to the variance of the unstructured processes  $Z_Y$  and  $Z_X$  respectively. Significant parameters are shown in **bold**. For further information see section: 3

|                         | Median         | 2.5%           | 97.5%          | n.sample     | %accept   | n.effective   | Geweke.diag |
|-------------------------|----------------|----------------|----------------|--------------|-----------|---------------|-------------|
| (Intercept of Y)        | -1.1871        | -4.0872        | 0.9928         | 10000        | 64.2      | 16.0          | -7.8        |
| Elevation               | 0.0002         | -0.0002        | 0.0006         | 10000        | 64.2      | 299.9         | -2.0        |
| Precipitation           | 0.0002         | -0.0001        | 0.0005         | 10000        | 64.2      | 206.4         | 0.4         |
| $\tau_Y^2$              | 19.6638        | 13.2754        | 45.1344        | 10000        | -         | 8.5           | -1.3        |
| $\sigma_Y^2$            | 0.3658         | 0.0357         | 0.7923         | 10000        | -         | 3.1           | 1.8         |
| <b>(Intercept of X)</b> | <b>3.0309</b>  | <b>2.4178</b>  | <b>3.9749</b>  | <b>10000</b> | <b>61</b> | <b>24.3</b>   | <b>-0.9</b> |
| <b>Dist. to road</b>    | <b>-0.0002</b> | <b>-0.0004</b> | <b>-0.0001</b> | <b>10000</b> | <b>61</b> | <b>1294.1</b> | <b>0.5</b>  |
| Population              | 0.0000         | -0.0001        | 0.0001         | 10000        | 61        | 1320.2        | 0.4         |
| $\tau_X^2$              | 5.2708         | 2.7058         | 9.5806         | 10000        | -         | 8.7           | -1.1        |
| $\sigma_X^2$            | 0.1818         | 0.0637         | 0.3250         | 10000        | -         | 7.9           | -1.1        |

Table B.2: Posterior summaries of all the parameters in Model II with the associated 95% credible intervals for the example of pines. The parameter  $\tau^2$  represents the variance of the common spatial effect. Parameters  $\sigma^2$  and  $\sigma^2$  correspond to the variance of the unstructured process  $Z_Y$  and  $Z_X$ . Significant parameters for the fixed effect are shown in **bold**. For further information see section: 3

|                      | Median  | 2.5%    | 97.5%   | n.sample | %accept | n.effective | Geweke.diag |
|----------------------|---------|---------|---------|----------|---------|-------------|-------------|
| <b>(Intercept)</b>   | -0.7085 | -1.0766 | -0.3426 | 5000     | 51.6    | 80.5        | -4.9        |
| <b>Dist. to road</b> | -0.0002 | -0.0004 | -0.0001 | 5000     | 51.6    | 170.9       | -1.2        |
| Population           | 0.0000  | -0.0001 | 0.0001  | 5000     | 51.6    | 150.2       | -0.2        |
| <b>Elevation</b>     | 0.0002  | 0.0000  | 0.0004  | 5000     | 51.6    | 79.7        | 1.6         |
| <b>Precipitation</b> | 0.0003  | 0.0001  | 0.0004  | 5000     | 51.6    | 85.9        | 3.5         |
| $\tau^2$             | 6.8838  | 4.7169  | 11.8695 | 5000     | -       | 5.5         | 5.1         |
| $\sigma^2$           | 9.7797  | 2.8682  | 72.7988 | 5000     | -       | 5000.0      | 1.1         |

Table B.3: Posterior summaries of all the parameters in Model III with the associated 95% credible intervals for the example of pines. Parameters  $\sigma_Y^2$  and  $\sigma_X^2$  correspond to the variance for the presence ( $Y$ ) and the sample ( $X$ ). The term  $\text{corr}_{X,Y}$  indicates the correlation between these two processes. Significant parameters for the fixed effect are shown in **bold**. For further information see section: 3

|                         | Median  | 2.5%    | 97.5%   | n.sample | %accept | n.effective | Geweke.diag |
|-------------------------|---------|---------|---------|----------|---------|-------------|-------------|
| <b>(Intercept of Y)</b> | -7.7938 | -9.2851 | -6.3099 | 5000     | 55.6    | 60.5        | 6.4         |
| Elevation Y             | 0.0003  | -0.0001 | 0.0007  | 5000     | 55.6    | 102.6       | -3.0        |
| Precipitation Y         | 0.0002  | -0.0002 | 0.0005  | 5000     | 55.6    | 82.7        | 0.7         |
| <b>(Intercept of X)</b> | 3.4115  | 2.7572  | 4.4384  | 5000     | 55.6    | 58.4        | 5.7         |
| <b>Dist. to road X</b>  | -0.0002 | -0.0004 | -0.0001 | 5000     | 55.6    | 387.9       | -3.3        |
| Population X            | 0.0000  | -0.0001 | 0.0002  | 5000     | 55.6    | 437.5       | -0.3        |
| $\sigma_Y^2$            | 31.8726 | 21.3638 | 44.6661 | 5000     | -       | 8.2         | -3.5        |
| $\sigma_X^2$            | 6.8778  | 4.3181  | 15.4775 | 5000     | -       | 5.1         | 2.2         |
| $\text{corr}_{Y,X}$     | 0.972   | 0.906   | 0.994   | -        | -       | -           | -           |

1044 Appendix B.2. Maps of posterior variables for the presence of Pines

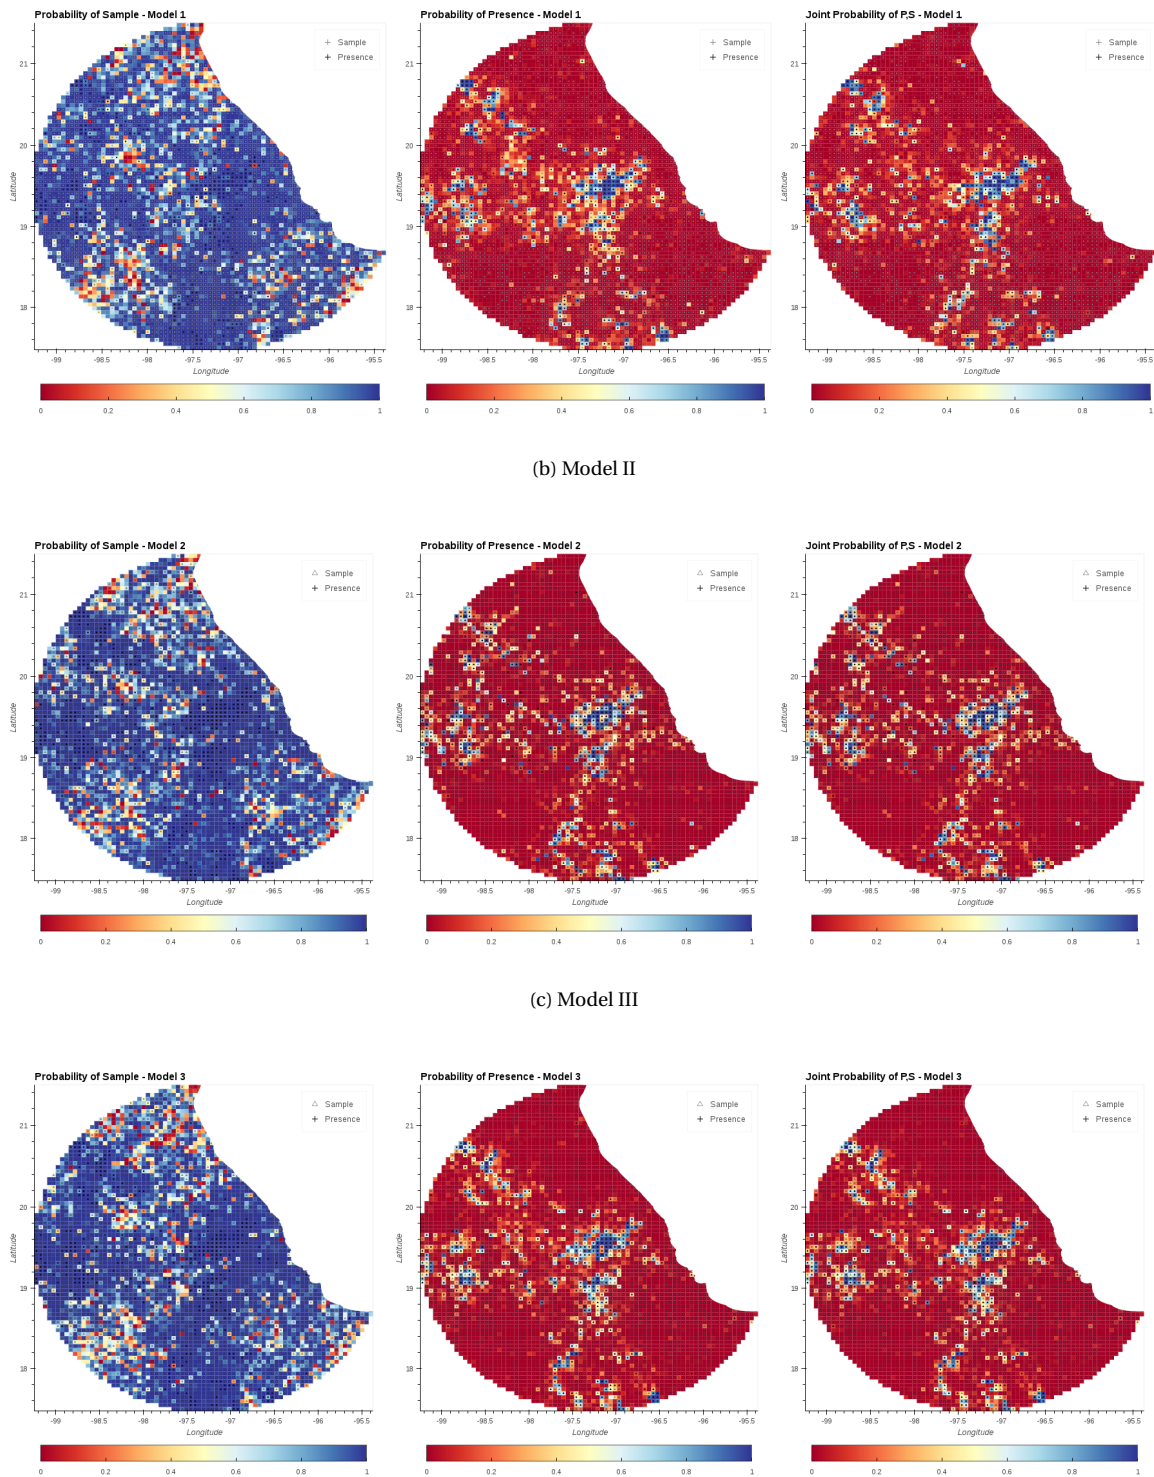

Figure B.6: Mean probability and 95% C.I. for Presence, Sample, and Joint presence and sample for Models I, II and III predicting presence of Pines (Class: Pinopsida) using Plants (Kingdom: Plantae) as sample.



(a) Model I

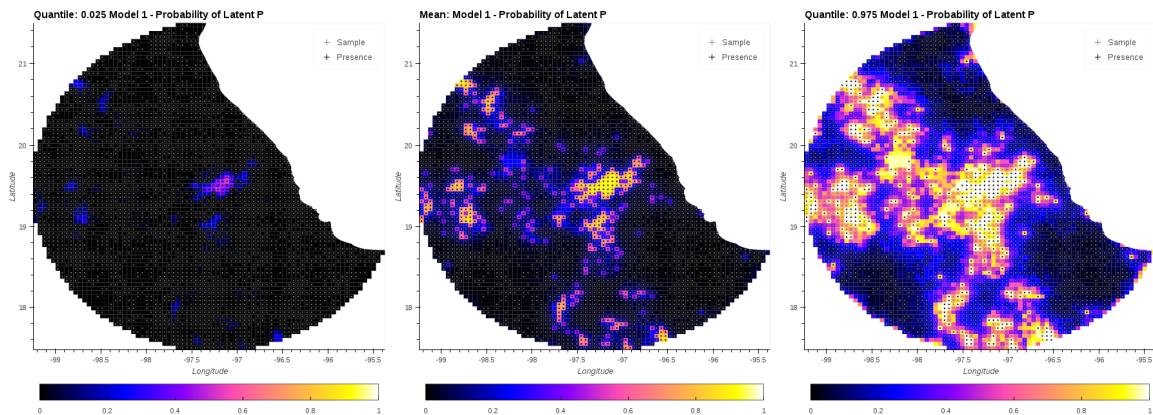

(b) Model II

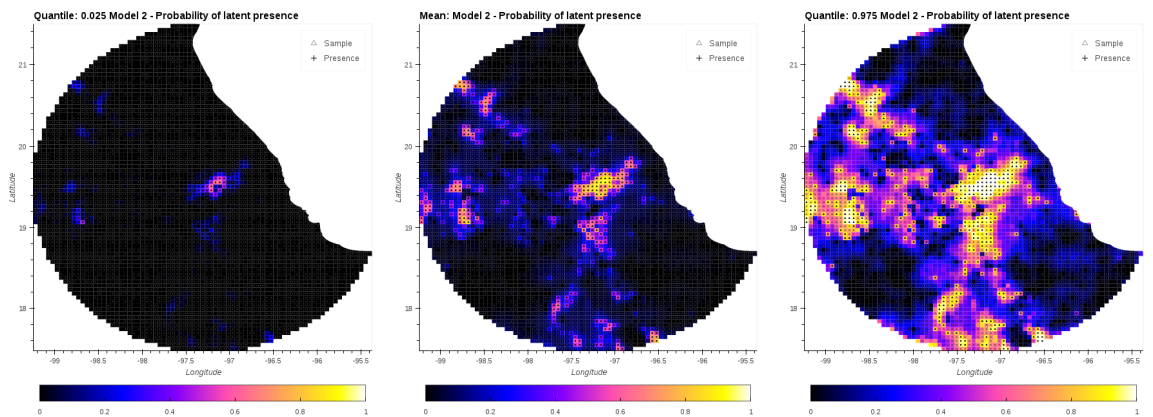

(c) Model III

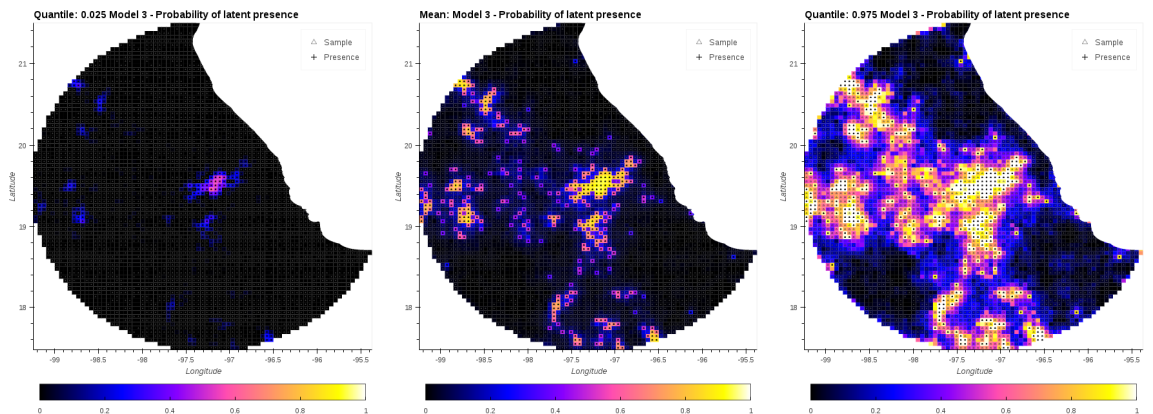

Figure B.7: Latent variable  $P_Y$  (Presence) for Models I, II and III predicting presence of Pines. The central column corresponds to the mean value. The columns on the left and right correspond to quantiles: 0.025 and 0.975, respectively.

(a) Model I

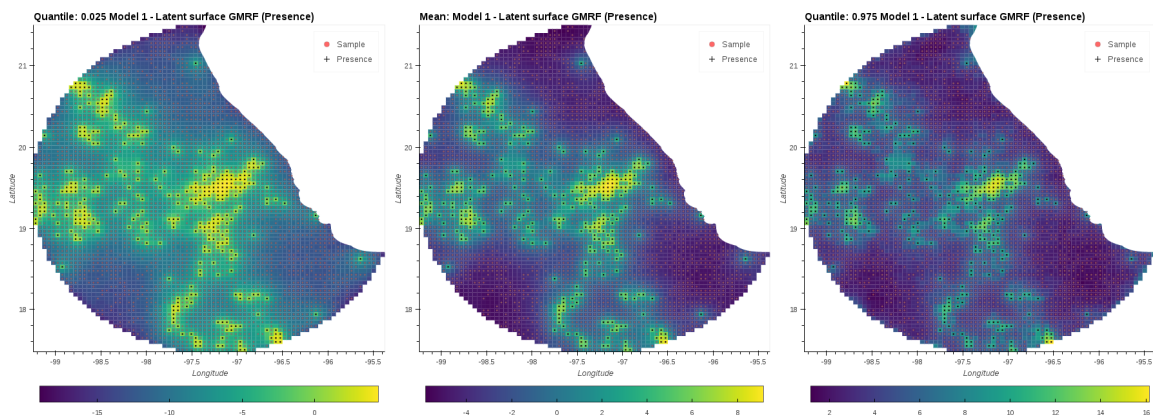

(b) Model II

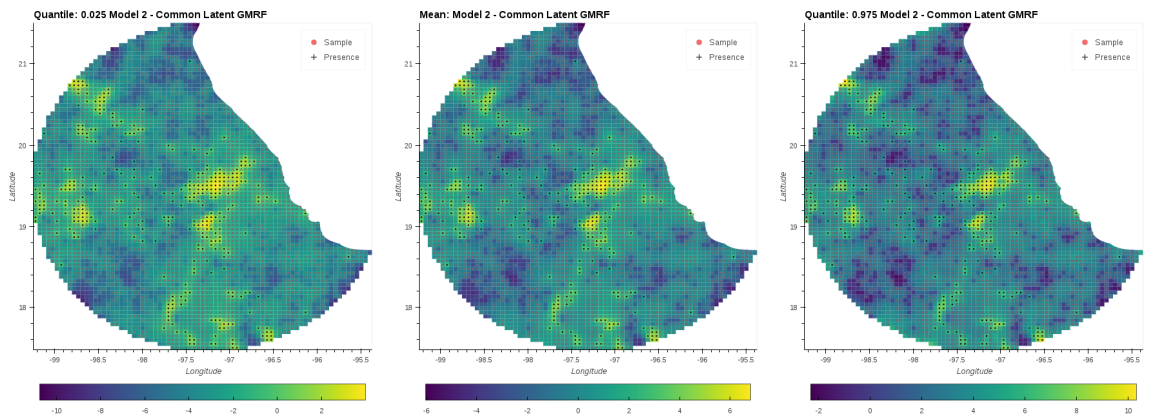

(c) Model III

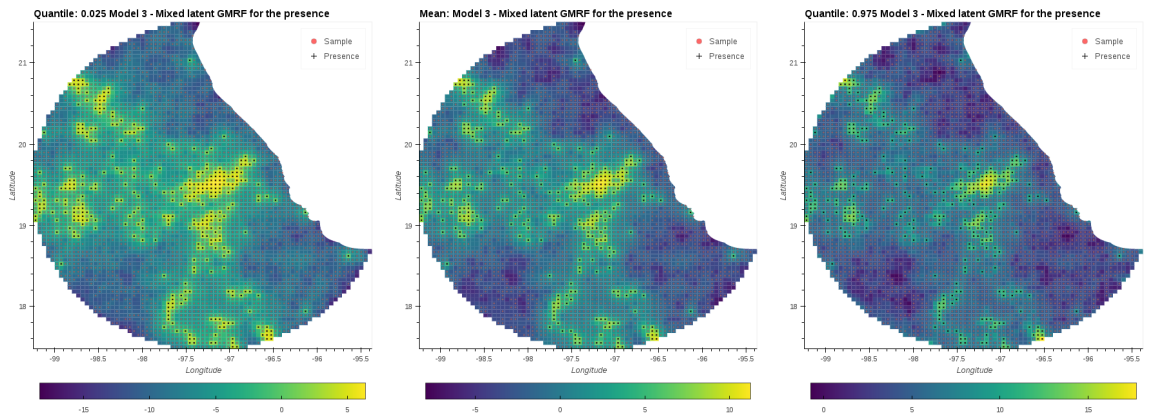

Figure B.8: Spatial random effect  $S_Y$ . The Gaussian Markov random field (GMRF) corresponding to the latent variable  $P_Y$  (Presence) for Models I, II and III predicting presence of Pines. The central column corresponds to the mean value, The column on the left and right corresponds to quantiles: 0.025 and 0.975, respectively.

(a) Model I

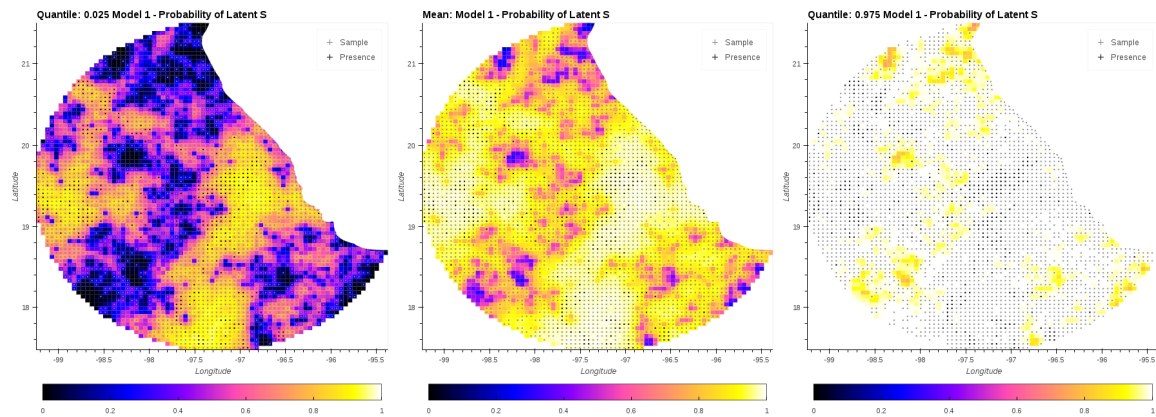

(b) Model II

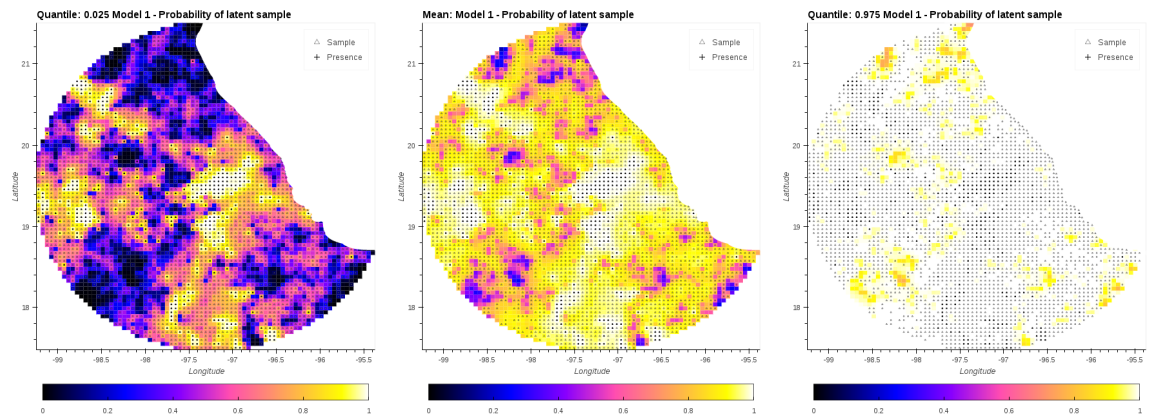

(c) Model III

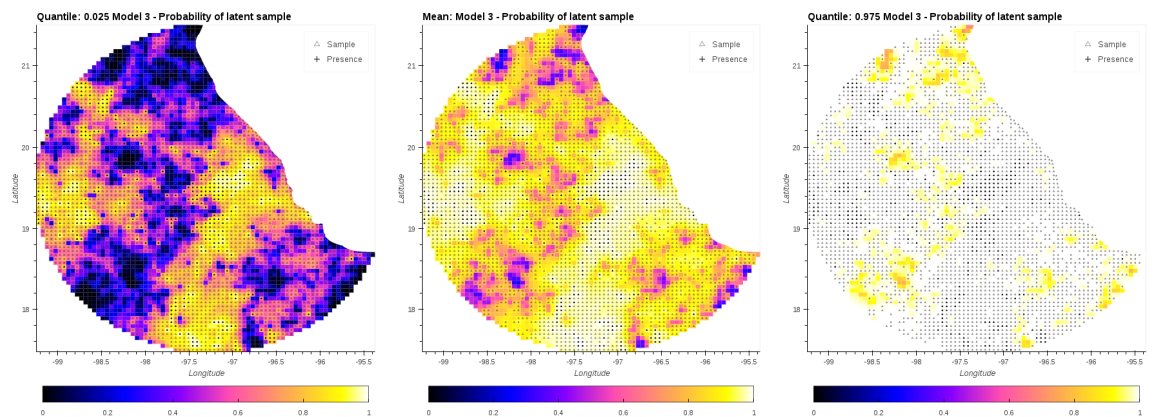

Figure B.9: Latent variable  $P_X$  (Sample) for Models I, II and III predicting presence of Pines using all plants as sample. The central column corresponds to the mean value. The columns on the left and right correspond to quantiles: 0.025 and 0.975, respectively.

(a) Model I

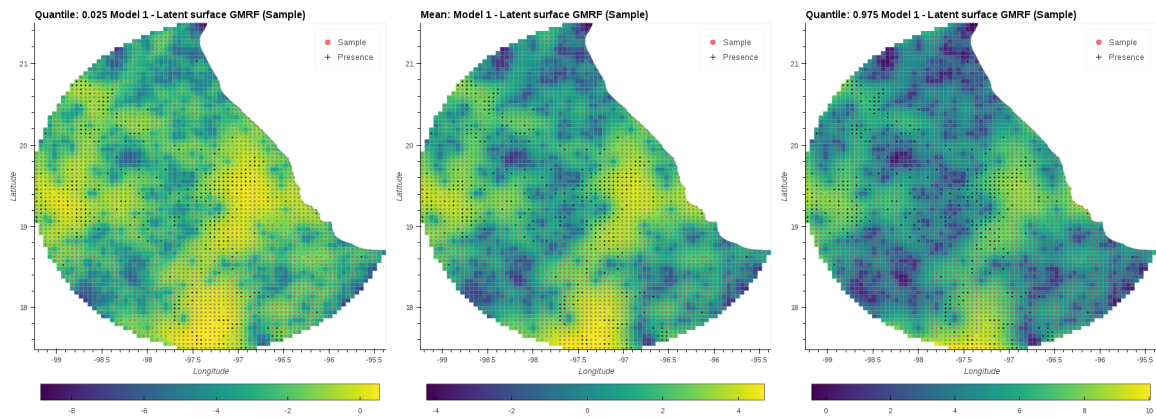

(b) Model II

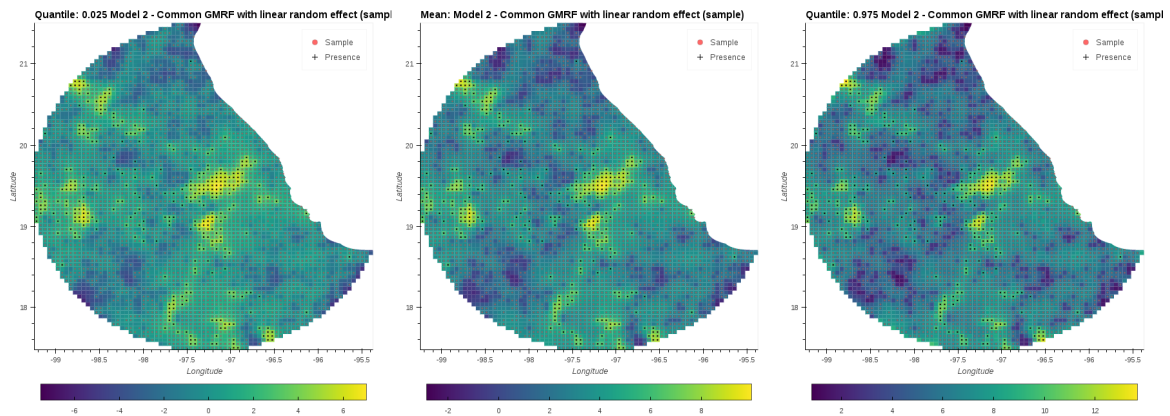

(c) Model III

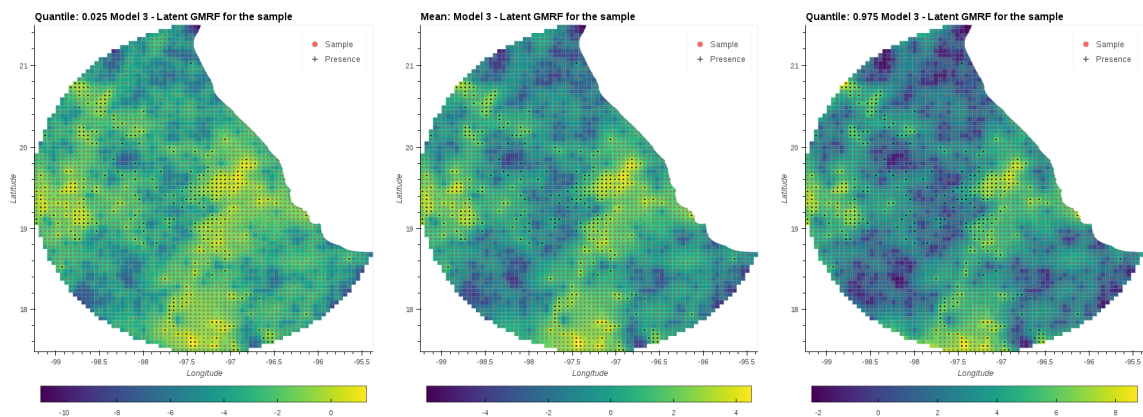

Figure B.10: Spatial random effect  $S_X$ . The Gaussian Markov random field (GMRF) corresponding to the latent variable  $S_X$  (Sample) for Models I, II and III predicting presence of Pines. The central column corresponds to the mean value. The column on the left and right corresponds to quantiles: 0.025 and 0.975, respectively.

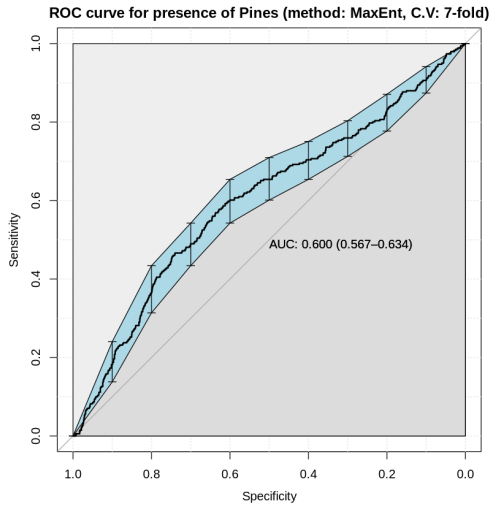

(a) MaxEnt

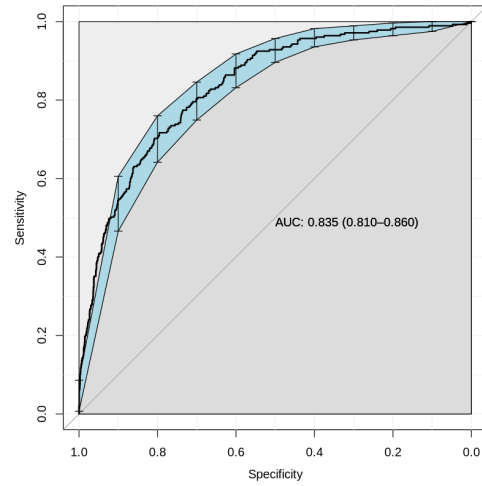

(b) Model I

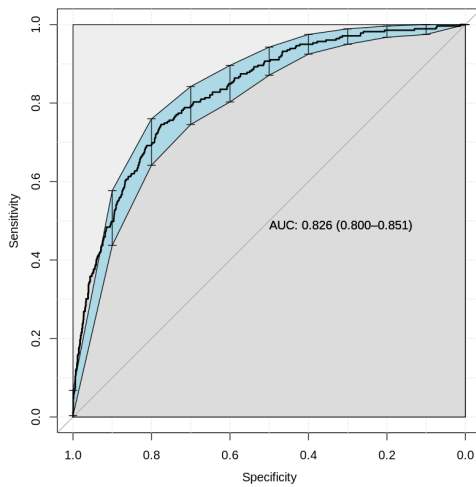

(c) Model II

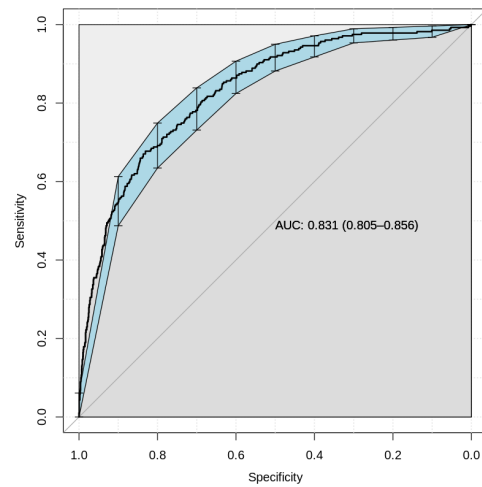

(d) Model III

Figure B.11: Area under the receiver operating characteristic curve (AUC-ROC) for the different models of Pines. The three models (b,c and d) perform significantly better than MaxEnt.

1045 **Appendix C. Estimates for the predicted presence of tyrannids using birds records as sample**

Table C.4: Posterior summaries of all the parameters in model I with the associated 95% credible intervals for the example of flycatchers. Parameters  $\tau_Y^2$  and  $\tau_X^2$  correspond to the variance of the spatial effects of the presence and the sample process ( $S_Y$  and  $S_X$ ) respectively. Likewise,  $\sigma_Y^2$  and  $\sigma_X^2$  correspond to the variance of the unstructured processes  $Z_Y$  and  $Z_X$  respectively. Significant parameters for the fixed effect are shown in **bold**. For further information see section: 3

|                     | Median  | 2.5%    | 97.5%   | n.sample | %accept | n.effective | geweke.diag |
|---------------------|---------|---------|---------|----------|---------|-------------|-------------|
| (Intercept X)       | -1.2410 | -2.7526 | 0.0656  | 10000    | 59      | 7.7         | 3.0         |
| <b>Dist.to road</b> | -0.0001 | -0.0002 | 0.0000  | 10000    | 59      | 1329.3      | 1.7         |
| Population          | 0.0000  | -0.0001 | 0.0001  | 10000    | 59      | 1242.7      | 0.1         |
| $\tau_Y^2$          | 9.8274  | 5.3185  | 13.8716 | 10000    | 100     | 13.2        | 0.0         |
| $\sigma_X^2$        | 0.0063  | 0.0014  | 0.0196  | 10000    | 100     | 4.3         | 6.4         |
| (Intercept Y)       | -0.4842 | -1.4833 | 0.6361  | 10000    | 57.9    | 20.3        | 8.6         |
| Elevation           | 0.0000  | -0.0002 | 0.0002  | 10000    | 57.9    | 309.5       | 0.5         |
| Precipitation       | 0.0001  | -0.0001 | 0.0003  | 10000    | 57.9    | 143.8       | -3.4        |
| $\tau_Y^2$          | 1.9098  | 1.0779  | 3.6263  | 10000    | -       | 8.6         | -0.4        |
| $\sigma_Y^2$        | 0.5745  | 0.0867  | 1.8564  | 10000    | -       | 3.4         | -4.8        |

Table C.5: Posterior summaries of all the parameters in Model II with the associated 95% credible intervals for the example of flycatchers. The parameter  $\tau^2$  represents the variance of the common spatial effect. Parameters  $\sigma^2$  and  $\sigma^2$  correspond to the variance of the unstructured process  $Z_Y$  and  $Z_X$ . Significant parameters for the fixed effect are shown in **bold**. For further information see section: 3

|               | Median  | 2.5%    | 97.5%   | n.sample | %accept | n.effective | Geweke.diag |
|---------------|---------|---------|---------|----------|---------|-------------|-------------|
| (Intercept)   | -1.6937 | -2.1358 | -1.3629 | 10000    | 47.6    | 68.7        | 4.7         |
| Dist to road  | -0.0001 | -0.0002 | 0.0001  | 10000    | 47.6    | 443.7       | -0.8        |
| Population    | 0.0000  | -0.0001 | 0.0001  | 10000    | 47.6    | 300.6       | -1.4        |
| Elevation     | -0.0001 | -0.0003 | 0.0001  | 10000    | 47.6    | 175.3       | 1.6         |
| Precipitation | 0.0000  | -0.0001 | 0.0002  | 10000    | 47.6    | 192.1       | 2.4         |
| $\tau^2$      | 10.1800 | 7.3033  | 14.9518 | 10000    | -       | 18.8        | -3.8        |
| $\sigma^2$    | 0.0089  | 0.0022  | 0.0829  | 10000    | -       | 1552.6      | 0.4         |

Table C.6: Posterior summaries of all the parameters in Model III with the associated 95% credible intervals for the example of flycatchers. Parameters  $\sigma_Y^2$  and  $\sigma_X^2$  correspond to the variance for the presence (Y) and the sample (X). The term  $\text{corr}_{X,Y}$  indicates the correlation between these two processes. Significant parameters for the fixed effect are shown in **bold**. For further information see section: 3

|                      | Median  | 2.5%    | 97.5%   | n.sample | %accept | n.effective | Geweke.diag |
|----------------------|---------|---------|---------|----------|---------|-------------|-------------|
| (Intercept Y)        | -0.9374 | -1.6520 | -0.2057 | 5000     | 53.3    | 110.0       | 1.0         |
| Elevation            | 0.0000  | -0.0002 | 0.0002  | 5000     | 53.3    | 88.5        | -1.2        |
| Precipitation        | 0.0001  | -0.0001 | 0.0003  | 5000     | 53.3    | 150.2       | -2.0        |
| (Intercept X)        | -1.4153 | -1.9346 | -0.9441 | 5000     | 53.3    | 85.2        | 0.4         |
| <b>Dist. to road</b> | -0.0001 | -0.0002 | 0.0000  | 5000     | 53.3    | 523.5       | 0.5         |
| Population           | 0.0000  | -0.0001 | 0.0001  | 5000     | 53.3    | 232.1       | -1.0        |
| $\sigma_Y^2$         | 3.5179  | 2.7614  | 6.0832  | 5000     | -       | 5.6         | -0.7        |
| $\sigma_X^2$         | 7.3840  | 5.9431  | 12.1276 | 5000     | -       | 7.1         | -0.6        |
| $\text{CORR}_{Y,X}$  | -       | -       | -       | -        | -       | -           | -           |

1046 Appendix C.1. Maps of posterior probabilities for Tyrannids

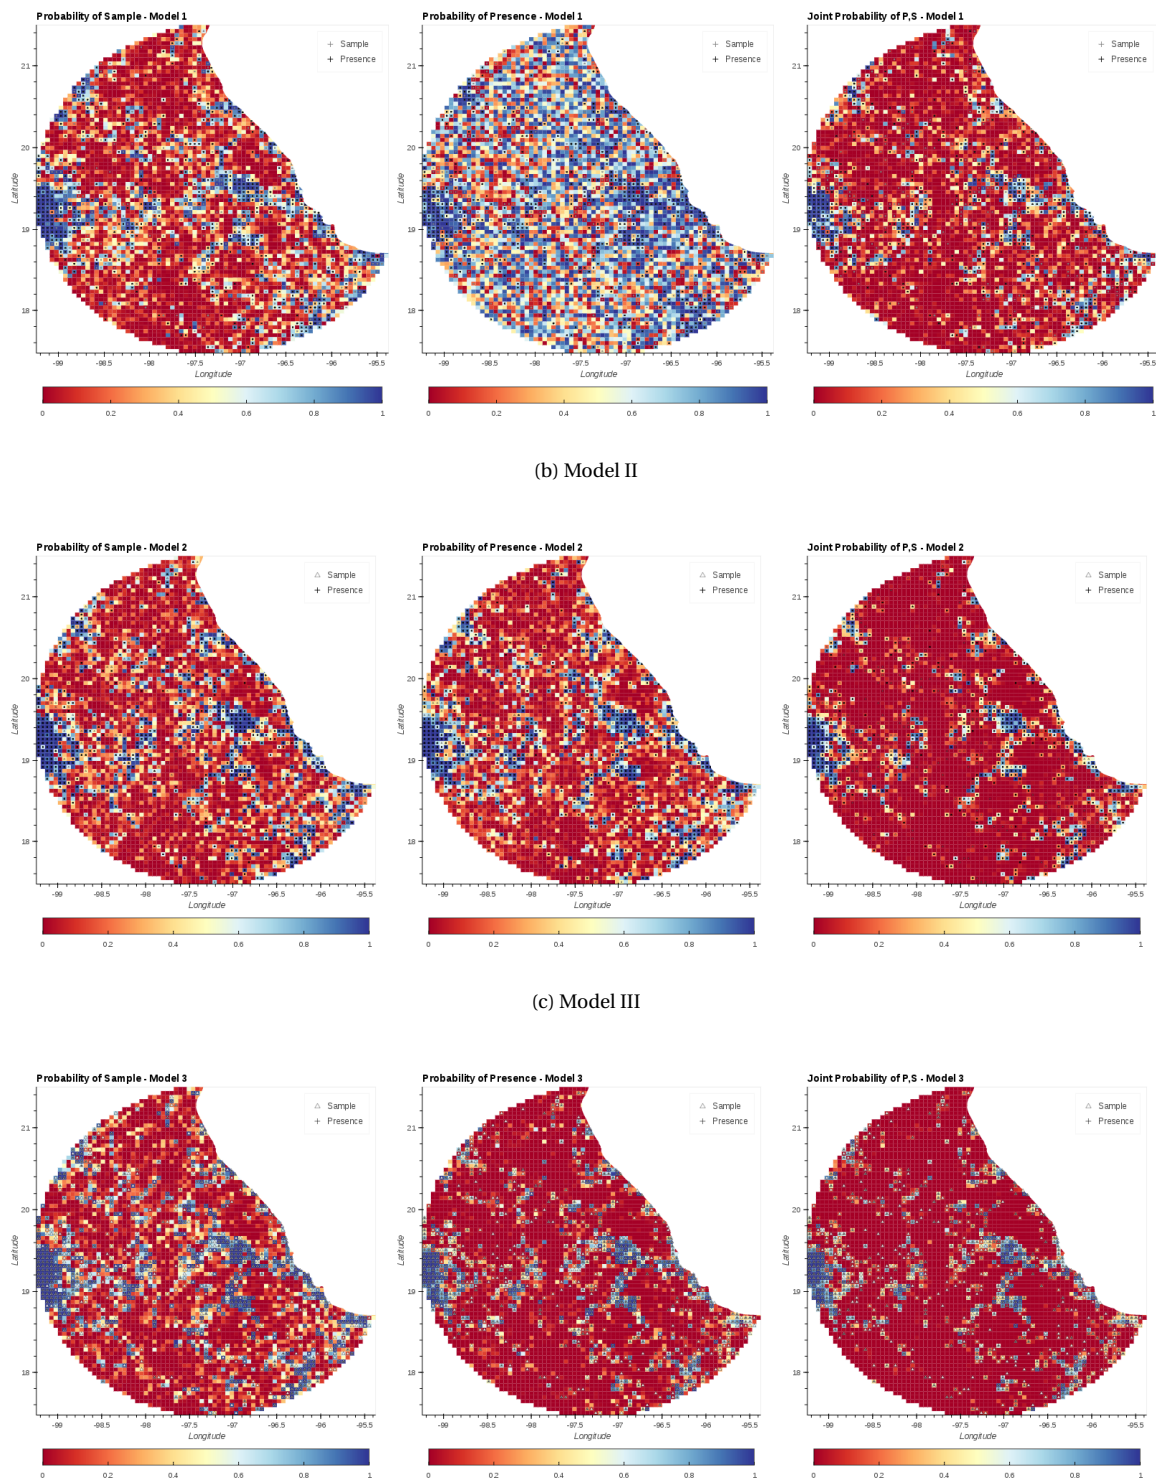

Figure C.12: Mean probability and 95% C.I. for Presence, Sample, and Joint presence and sample for Models I, II and III predicting presence of flycatchers (Family: Tyrannidae) using birds (Class: Aves) as sample.

(a) Model I

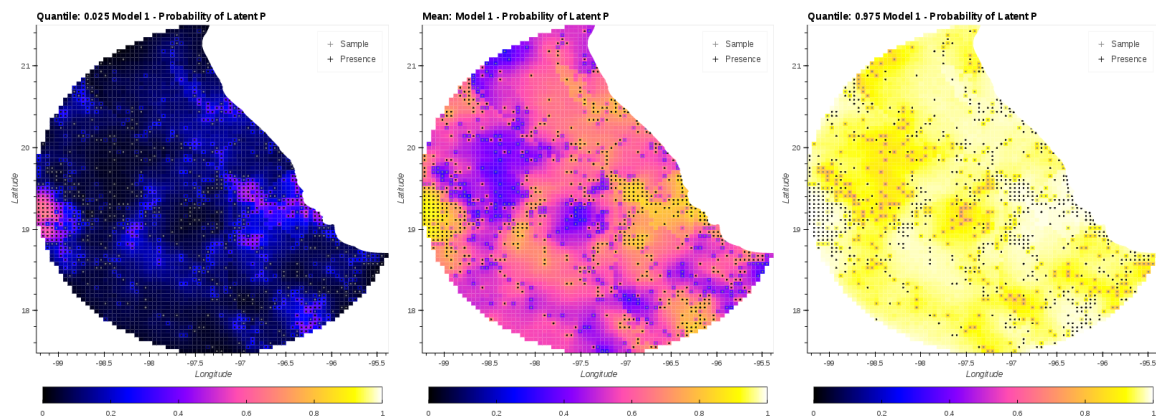

(b) Model II

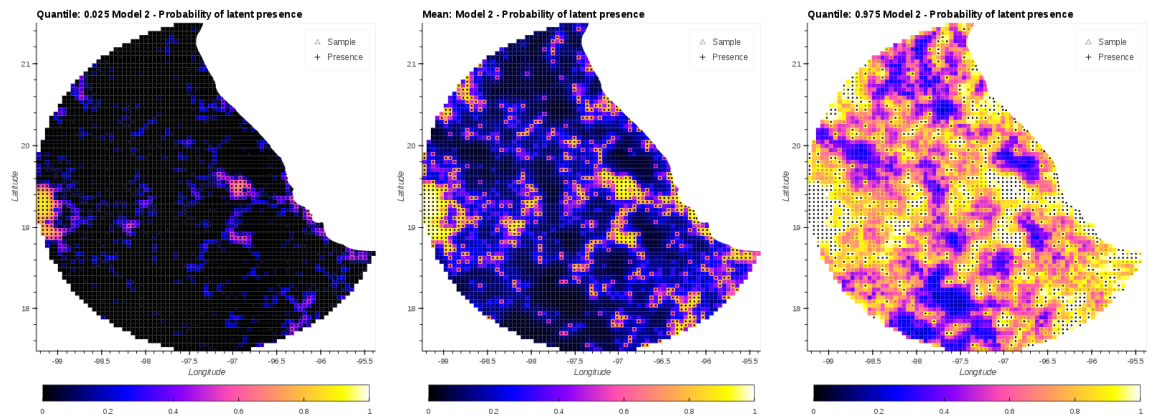

(c) Model III

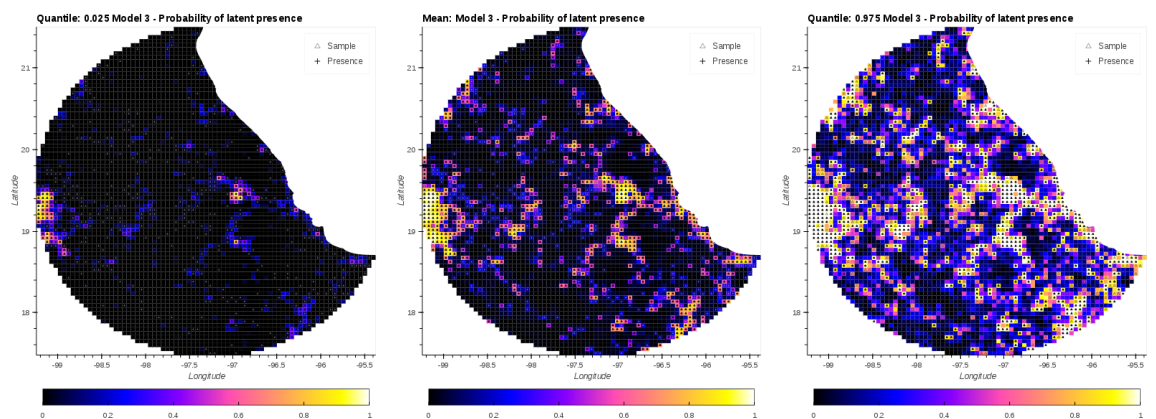

Figure C.13: Latent variable  $P_Y$  (Presence) for Models I, II and III predicting presence of flycatchers (Family: Tyrannidae). The central column corresponds to the mean value. The columns on the left and right correspond to quantiles: 0.025 and 0.975, respectively.



(a) Model I

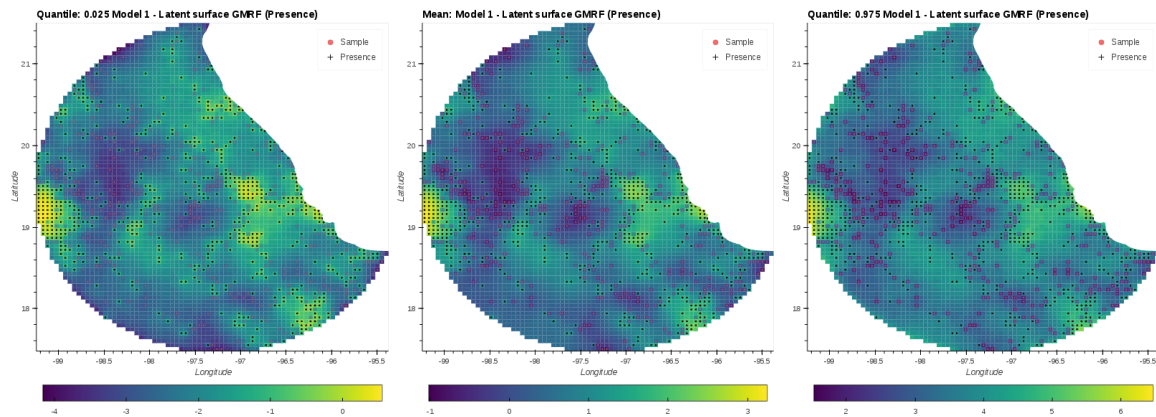

(b) Model II

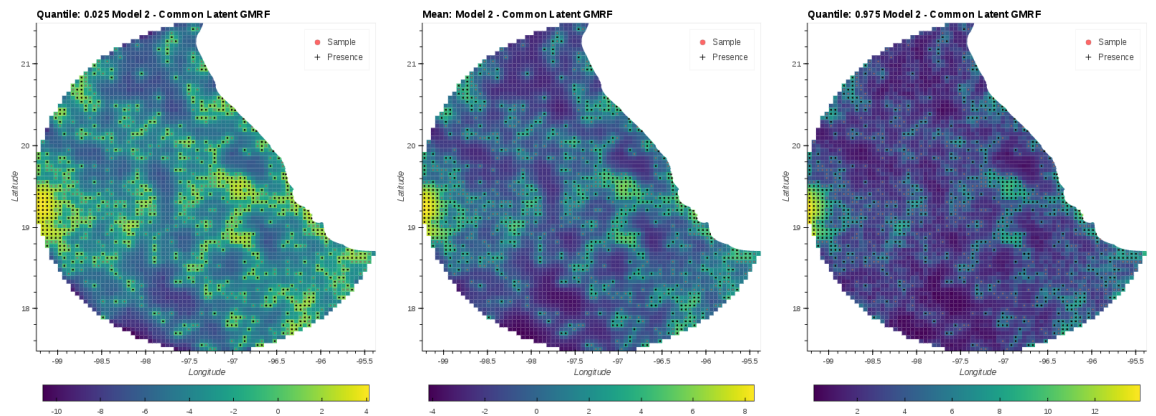

(c) Model III

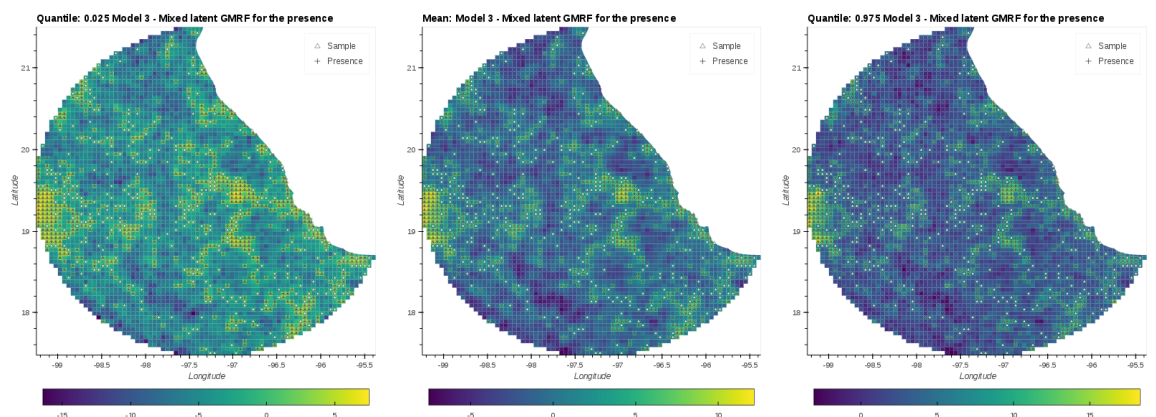

Figure C.14: Spatial random effect  $S_Y$ . The Gaussian Markov random field (GMRF) corresponding to the latent variable  $P_Y$  (Presence) for Models I, II and III predicting presence of flycatchers (Family: Tyrannidae). The central column corresponds to the mean value. The columns on the left and right correspond to quantiles: 0.025 and 0.975, respectively.

(a) Model I

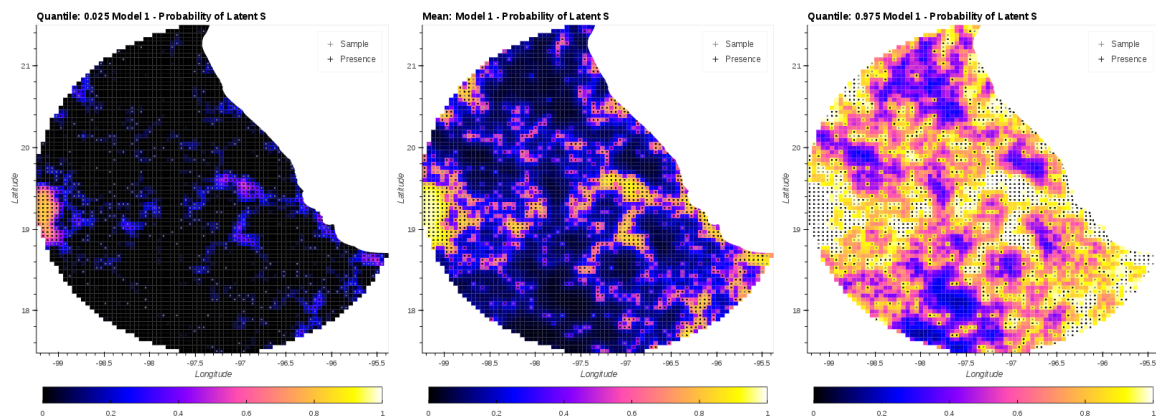

(b) Model II

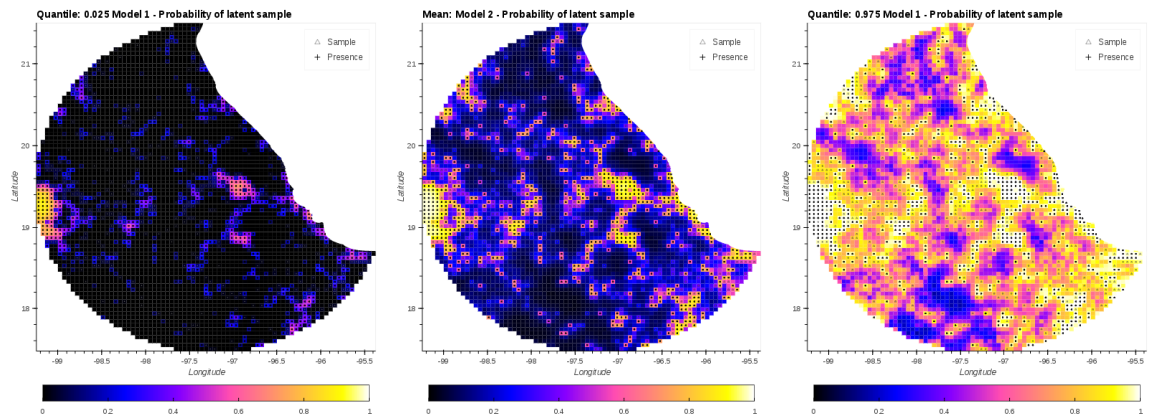

(c) Model III

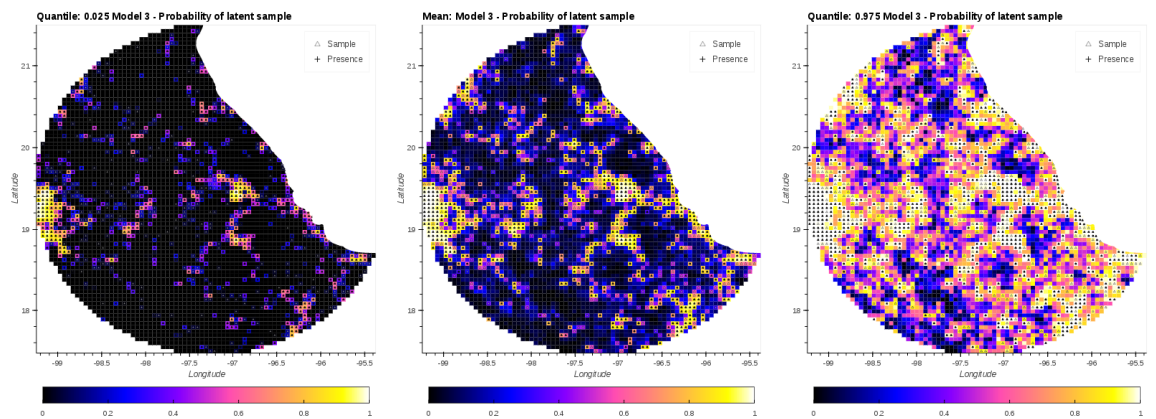

Figure C.15: Latent variable  $P_X$  (Sample) for Models I, II and III predicting presence of flycatchers (Tyrannidae) using all birds as sample. The central column corresponds to the mean value. The columns on the left and right correspond to quantiles: 0.025 and 0.975, respectively.

(a) Model I

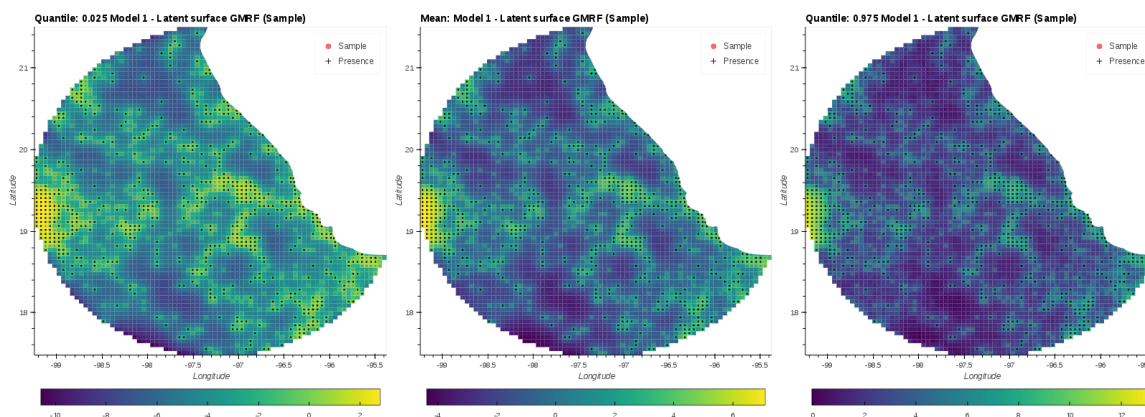

(b) Model II

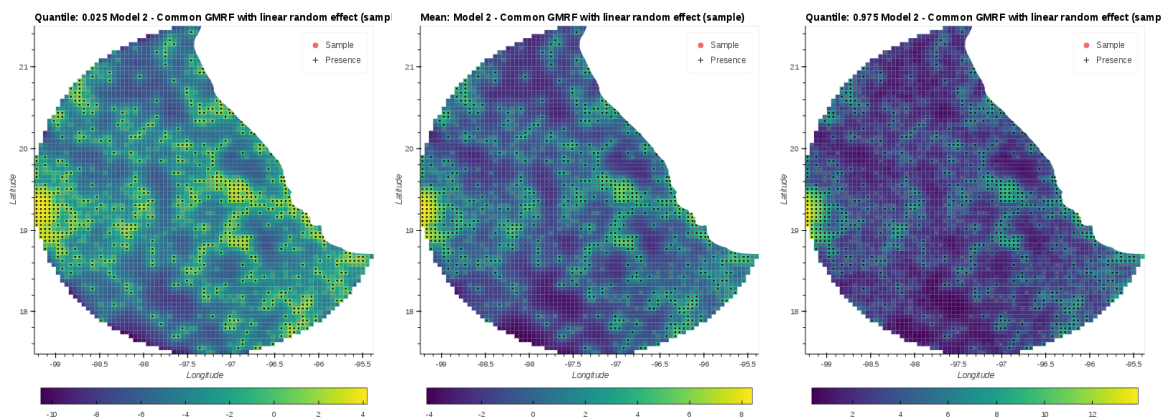

(c) Model III

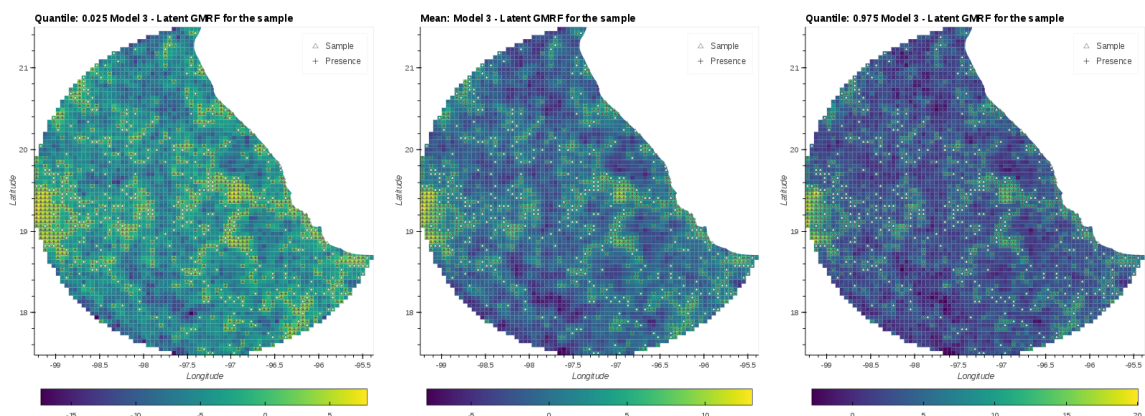

Figure C.16: Spatial random effect  $S_X$ . The Gaussian Markov random field (GMRF) corresponding to the latent variable  $P_X$  (Sample) for Models I, II and III predicting presence of flycatchers (Tyrannidae). The central column corresponds to the mean value. The columns on the left and right correspond to quantiles: 0.025 and 0.975, respectively.

ROC curve for presence of Tyrannidae (method: MaxEnt, C.V: 7-fold)

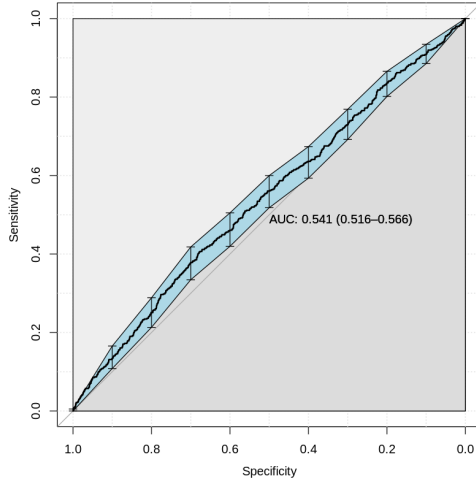

(a) MaxEnt

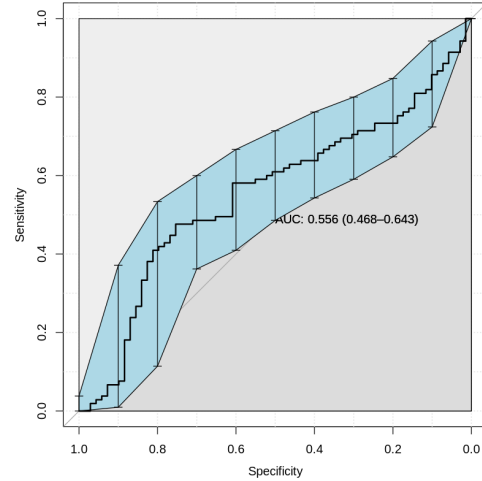

(b) Model I

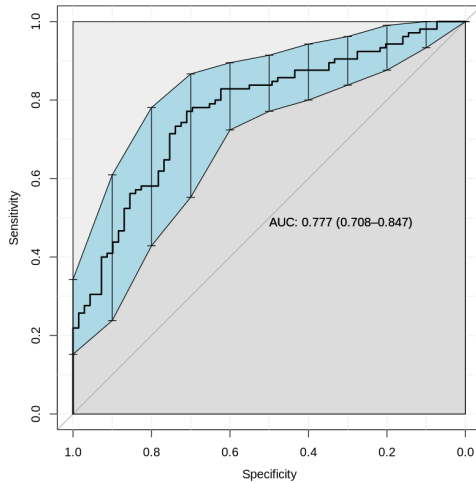

(c) Model II

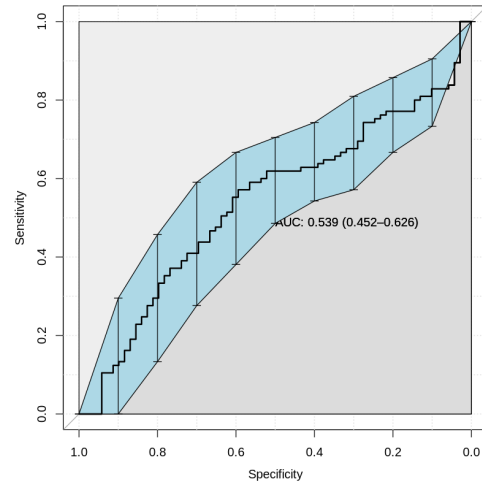

(d) Model III

Figure C.17: Area under the receiver operating characteristic curve (AUC-ROC) for MaxEnt and models I, II and III of flycatchers. MaxEnt and models I and III achieved low AUC. Although, on average models I and III outperformed MaxEnt, their variances show that these models are not appropriate when the proportion of missing data is significantly higher than the presences. See the discussion section for a more detail explanation.
